# Supplementary material for: Sushi domain-containing protein 4 controls synaptic plasticity and motor learning
Source: eLife. 2021 Mar 4;10:e65712. doi: 10.7554/eLife.65712 (PMC7972451; doi:10.7554/eLife.65712)
Supplement: Figure 1—source data 1. [file elife-65712-fig1-data1.xlsx]

## Sheet: Figure 1B
Figure 1B
Susd4 mRNA expression (relative to Rpl13a)
		CB N=1	CB N=2	CB N=3	Mean	s.e.m.	ION N=1	ION N=2	ION N=3	Mean	s.e.m.
	P0	3.09271	2.19977	3.37219	2.888	0.3536	19.96	19.19	16.53	18.56	1.039
	P3	1.89685	0.940186	1.47426	1.437	0.2768	24.43	21.17	18.43	21.34	1.734
	P7	0.9092	1.82865	2.46323	1.734	0.4511	21.94	25.35	27.68	24.99	1.667
	P14	16.941	8.07456	12.7842	12.6	2.561	35.48	33.29	31.94	33.57	1.031
	P21	19.4088	17.7185	12.4334	16.52	2.101	29.73	28.32	25.58	27.88	1.218
	Ad 3mo	12.5915	8.15659	4.26411	8.337	2.406	15.82	22.02	18.95	18.93	1.79

## Sheet: Figure 1D 
Figure 1D
Genomic Sequence Deleted
Mus musculus strain C57BL/6J chromosome 1, GRCm38.p6 C57BL/6J
Sequence ID: NC_000067.6Length: 195471971

## Sheet: Figure 1F
Figure 1F	Rotarod
	Time to Fall (sec)
		WT													KO
		WT 1	WT 2	WT 3	WT 4	WT 5	WT 6	WT 7	WT 8	WT 9	WT 10	WT 11	Mean	s.e.m.	KO 1	KO 2	KO 3	KO 4	KO 5	KO 6	KO 7	Mean	s.e.m.
DAY 1	1	53	43	69	138	39	159	17	67	137	68	149	85.36	15.22	102	117	124	81	39	22	62	78.14	14.75
	2	66	57	86	211	90	170	46	53	129	45	117	97.27	16.44	92	142	148	60	53	52	44	84.43	16.68
	3	71	138	112	144	138	188	58	56	59	50	213	111.5	17.25	67	120	151	58	44	33	73	78	16.05
DAY 2	1	123	154	121	203	124	220	85	50	163	35	300	143.5	23.28	48	158	100	119	100	103	52	97.14	14.38
	2	157	125	145	91	88	232	83	47	145	37	300	131.8	23.65	36	221	155	100	55	75	56	99.71	25.05
	3	169	170	113	138	132	249	151	131	119	23	235	148.2	18.35	40	117	151	53	71	71	56	79.86	15.02
DAY 3	1	238	148	67	208	69	155	119	21	129	53	202	128.1	21.21	173	178	164	75	91	75	26	111.7	22.55
	2	217	170	64	122	146	222	116	78	156	72	259	147.5	19.67	138	122	154	62	102	49	19	92.29	18.92
	3	242	186	53	103	121	190	135	116	154	47	264	146.5	21.04	140	126	197	53	86	30	83	102.1	21.41
DAY 4	1	308	174	160	185	215	190	138	136	134	74	360	188.5	24.65	140	169	225	69	60	64	84	115.9	24.07
	2	246	227	189	93	227	155	131	181	66	68	297	170.9	22.92	101	59	187	50	55	44	41	76.71	19.88
	3	297	150	173	112	156	168	107	142	54	52	364	161.4	28.45	45	88	159	67	20	63	97	77	16.77
DAY 5	1	318	231	62	90	115	225	76	184	116	66	396	170.8	33.52	110	119	159	45	71	57	77	91.14	15.15
	2	261	191	173	215	146	204	82	191	99	90	420	188.4	28.75	53	204	189	94	136	67	42	112.1	24.74
	3	282	208	168	98	141	160	88	181	185	53	390	177.6	28.39	38	137	137	47	73	29	52	73.29	17.23
	two-way ANOVA with repeated measures
	Source of Variation		P value	F (DFn, DFd)
	Time x genotype		0.0079	F (14, 224) = 2.220
	Time		<0.0001	F (14, 224) = 3.469
	genotype		0.0553	F (1, 16) = 4.272
	Subject		<0.0001	F (16, 224) = 25.35

## Sheet: sup3
Figure Sup 3
	Footprint test
		WT			KO			Unpaired Student’s t-test
		Mean	s.e.m.	N=	Mean	s.e.m.	N=	P=
	Forelim stance	3.34	0.08542	9	3.229	0.06336	10	0.3059
	Forelimb stride	5.702	0.2348	9	5.568	0.09352	10	0.5882
	Hindlimb stance:	3.903	0.09012	9	3.802	0.09497	10	0.4533
	Hindlimb stride:	5.683	0.2605	9	5.412	0.14	10	0.358
	Print separation:	0.8803	0.04673	9	1.082	0.05672	10	0.0148

## Sheet: sup4
Figure Sup 4
	Cerebellar Area								Extent Molecular Layer
		Area µm^2	Area mm^2		Mean Area (µm^2)	WT	KO				Length PC		WT	KO
	WT1 Cb1	7.79075e+06	7.79075		#1	7.85225e+06	8.65627e+06		WT n1	II	155.361		174.847	130.609
	WT1 Cb2	8.38961e+06	8.38961		#2	8.21089e+06	7.9295e+06				155.257		115.353	161.42
	WT1 Cb3	7.3764e+06	7.3764		#3	9.06858e+06	9.20135e+06				157.485		116.73	134.363
	WT2 Cb1	8.67957e+06	8.67957							VI	130.279		151.749	174.055
	WT2 Cb2	8.62672e+06	8.62672								120.212		136.771	142.17
	WT2 Cb3	7.32639e+06	7.32639								122.317		130.587	125.952
	WT3 Cb1	9.135e+06	9.135		Mean Area (mm^2)	WT	KO			X	134.86		152.709	172.522
	WT3 Cb2	8.96569e+06	8.96569		#1	7.85225	8.65627				149.896		138.636	160.256
	WT3 Cb3	9.10505e+06	9.10505		#2	8.21089	7.9295				148.57		123.175	132.246
	KO1 Cb1	8.74489e+06	8.74489		#3	9.06858	9.20135		WT n2	II	172.726		155.222	169.479
	KO1 Cb2	8.90338e+06	8.90338								170.934		119.222	161.73
	KO1 Cb3	8.32054e+06	8.32054								167.331		121.155	131.093
	KO2 Cb1	7.62233e+06	7.62233							VI	164.367		168.535	180.437
	KO2 Cb2	8.15547e+06	8.15547								146.488		170.663	157.01
	KO2 Cb3	8.01069e+06	8.01069								146.034		122.536	124.688
	KO3 Cb1	8967880	8.96788							X	132.318			163.428
	KO3 Cb2	9.12529e+06	9.12529								129.184			147.904
	KO3 Cb3	9.51088e+06	9.51088								137.891			145.978
									WT n3	II	177.505
											166.336		WT	KO
											163.408		135.643	142.131
										VI	134.24		139.703	147.392
											131.89		138.173	155.008
											139.134		131.866	154.101
										X	159.477		153.911	154.045
											153.638			152.437
											149.348
									KO n1	II	167.14
											167.05
											169.724
										VI	144.689
											144.447
											141.711
										X	152.597
											151.453
											136.052
									KO n2	II	158.184
											155.336
											144.082
										VI	151.141
											150.674
											156.835
										X	153.125
											148.063
											133.938
									KO n3	II	171.074
											169.714
											165.459
										VI	129.524
											129.972
											133.547
										X	149.564
											151.072
											136.047
									WT n4	II	146.532
											143.937
											145.733
										VI	174.264
											169.029
											162.744
										X	146.463
											142.813
											140.265
									WT n5	II	163.872
											168.164
											152.281
										VI	173.441
											166.427
											163.789
										X	129.891
											133.328
											135.604
									KO n4	II	167.001
											163.886
											177.296
										VI	194.077
											196.683
											193.711
										X	125.239
											121.799
											132.15
									KO n5	II	184.902
											182.754
											180.417
										VI	129.443
											126.943
											113.172
										X	141.316
											158.653
											151.962
									KO n6	II	162.522
											170.877
											167.194
										VI	174.413
											173.163
											164.856
										X	153.8
											157.156
											151.671
									KO n7	II	161.471
											162.632
											156.468
										VI	184.899
											197.919
											197.1
										X	147.422
											148.946
											152.539

## Sheet: sup5
Figure Sup 5		Mean Firing Rate:										CV:										CV2:
			N	Mean	s.e.m.								N	Mean	s.e.m.								N	Mean	s.e.m.
		WT	5	23.91	1.703							WT	5	0.8453	0.06056							WT	5	0.7366	0.04934
		KO	4	23.91	0.4583							KO	4	0.7633	0.04017							KO	4	0.6985	0.01993
			Mann Whitney test		P=0.2857								Mann Whitney test		P=0.4127								Mann Whitney test		P=0.5373
	Genotype	WT					KO					WT					KO					WT					KO
		N1	N2	N3	N4	N5	N1	N2	N3	N4		N1	N2	N3	N4	N5	N1	N2	N3	N4		N1	N2	N3	N4	N5	N1	N2	N3	N4
	Mean Value	22.1963	23.3432	22.3211	21.1138	30.5719	23.83	24.5075	24.6573	22.6458		0.711711	1.0712	0.808534	0.789339	0.84578	0.823337	0.708038	0.681251	0.840575		0.707329	0.76026	0.812233	0.841285	0.561691	0.67752	0.695677	0.665592	0.755384
		21.9667	16.735	26.2783	15.6303	23.33	15.2417	37.305	33.2567	17.4967		0.909318	1.14172	1.01795	0.352139	12.4854	0.868302	1.00773	0.424884	0.867838		0.858081	1.04371	0.9569	0.23199	0.537942	0.876463	0.902245	0.545573	0.924085
		31.9233	15.485	15.525	25.8444	38.8633	18.9817	18.175	17.575	16.1217		0.835553	1.00975	0.127196	1.62219	0.65287	0.593592	0.195492	0.559622	1.03764		0.877926	0.987868	0.0956057	0.967615	0.581596	0.426935	0.146898	0.649799	0.972602
		42.6133	28.2683	17.1733	37.4175	29.2817	21.9417	34.6183	38.4667	22.0217		5.21362	2.4074	1.06757	1.14183	0.752962	0.755382	0.676351	0.987272	0.667059		0.207204	0.735614	1.00424	0.893594	0.708409	0.838936	0.917389	0.90847	0.88745
		22.8283	27.9483	17.005	25.8209	25.995	21.8433	17.1617	19.4183	18.0867		4.79455	2.49705	0.827541	0.62326	0.462651	0.470899	0.57802	0.807543	0.967719		0.615209	0.644831	0.97432	0.947655	0.310315	0.308686	0.735992	0.886671	0.967901
		19.55	25.6267	20.8633	19.1143	17.6267	25.3933	15.73	16.3083	21.22		0.850387	3.82545	0.897023	0.741187	0.937355	1.03246	0.794336	0.781866	0.758645		0.926701	0.540525	0.87911	0.823479	0.906221	0.968107	0.880243	0.812333	0.878287
		15.305	25.0583	15.8733	21.499	25.6117	15.585	18.485	27.6983	16.5117		0.350417	0.998224	0.490596	0.820589	0.941897	0.472577	0.571189	0.575211	0.893098		0.31546	0.941382	0.474452	0.946388	0.917548	0.400122	0.793695	0.884786	0.934872
		22.0617	15.205	24.715	15.027	32.7967	16.2417	22.205	15.4683	28.4617		0.774558	1.8259	0.643785	1.30629	0.28616	0.204945	0.676947	0.638639	0.699981		0.931348	0.649087	0.945828	0.821448	0.227873	0.104513	0.885192	0.921146	0.90481
		30.9433	15.5517	23.705	16.0761	22.15	16.71	28.79	15.6533	16.8483		0.452355	1.13654	0.49549	1.3754	0.957719	0.560673	1.00468	1.84336	0.878471		0.406018	0.809864	0.477446	0.451776	0.923493	0.363473	0.946675	0.414139	0.914558
		38.3617	17.7583	19.6017	20.6309	31.4917	18.7417	19.2783	19.7883	27.3483		0.681903	0.6424	0.802876	0.573832	0.197085	0.480034	0.57895	0.363486	0.890485		0.722133	0.721066	0.756891	0.675387	0.121574	0.324841	0.798149	0.351513	0.798593
		15.7717	15.9383	33.6017	16.6291	36.7	22.4	16.0717	15.0233	26.3633		0.93577	1.03681	0.721185	0.863657	0.610559	0.166018	0.375619	0.854771	0.44811		0.921368	1.00346	0.882595	0.923849	0.456487	0.103774	0.259995	0.895235	0.521997
		23.495	20.1767	22.2417	23.0206	28.2917	17.1417	16.1733	18.165	21.4683		0.934432	0.886989	0.919404	1.04536	0.878881	0.948657	0.709438	1.09952	0.321202		0.92043	0.891668	0.926744	0.960882	0.830786	0.934245	0.643357	1.00364	0.257066
		21.9767	36.975	40.435	21.2041	54.3933	21.2633	19.6683	19.6117	18.6533		0.797846	0.905677	1.00858	0.481692	0.349371	0.551613	1.19029	0.612766	1.00945		0.920079	0.892595	0.882352	0.568044	0.327356	0.627272	0.429961	0.927422	0.685932
		18.66	18.0917	19.1333	19.121	31.75	15.565	15.3317	17.0267	16.1567		0.755265	0.879929	0.704874	0.292517	0.708229	0.676763	0.773081	1.04297	0.853032		0.870397	0.879971	0.925479	0.242542	0.615355	0.605483	0.452018	0.993034	0.871599
		21.9317	19.0617	16.225	32.5041	19.2583	29.79	25.63	25.8883	20.995		0.79078	0.483941	0.648052	0.575953	0.996747	0.930509	0.45386	0.576378	1.39045		0.692412	0.448622	0.717748	0.841377	0.96115	0.842203	0.527646	0.82732	0.440254
		17.7767	16.58	28.3	27.18	29.91	35.0633	16.5167	16.36	19.7933		0.407683	0.944026	0.844719	0.702849	0.644674	0.711112	0.500414	0.786354	0.527788		0.432848	0.9442	0.846228	0.889816	0.502009	0.800446	0.561731	0.919032	0.480283
		15.245	18.0367	42.635	15.9655	43.415	17.0483	15.09	15.0717	35.7683		0.265659	0.58744	0.892703	0.544043	0.252687	0.917946	0.671641	0.882312	1.01697		0.17749	0.415205	0.876568	0.418277	0.137999	0.876176	0.705651	0.92733	0.915249
		29.38	33.7917	33.8567	23.5837	15.3517	19.6567	17.4283	16.6917	21.115		0.700623	0.803887	0.874676	0.708395	0.719708	0.704392	0.302156	0.874665	0.816655		0.858756	0.900442	0.890217	0.813385	0.451488	0.685746	0.263072	0.967975	0.920767
		35.8567	20.6633	19.765	15.2851	21.5017	23.28	21.7717	54.1583	16.865		0.672564	0.393004	0.34822	0.558816	0.246041	0.686883	0.715385	0.635627	0.835978		0.8514	0.302749	0.280005	0.463144	0.161081	0.629866	0.802037	0.370005	0.924563
		18.66	15.795	25.9283	19.2735	54.535	29.5067	15.3617	55.48	33.8817		0.878501	0.990822	0.904875	0.563926	0.873236	0.708994	0.509532	0.584034	0.76898		0.873266	0.980776	0.921152	0.5775	0.799317	0.80368	0.454323	0.352602	0.921781
		44.185	17.0683	27.5917	27.8369	62.15	16.7983	22.4183	24.19	35.9417		0.620278	0.559895	0.732818	0.668636	0.493396	0.418569	0.786285	0.626755	0.812064		0.811537	0.433868	0.921171	0.820597	0.477292	0.325021	0.938651	0.921204	0.903654
		29.3417	26.68	22.0333	15.7526	55.8833	17.4767	15.375	16.975	25.98		0.49998	0.950489	0.881345	0.862621	0.359379	1.99624	0.64356	0.266775	0.911247		0.550236	0.512182	0.939274	0.790635	0.268727	0.51351	0.635948	0.237249	0.938709
		24.5467	39.1333	16.225	24.7618	15.1283	17.7117	23.39	23.4467	25.8667		0.35029	0.980323	0.89772	0.655413	2.17624	0.889218	0.835722	0.619039	0.708216		0.277883	0.899059	0.955671	0.841056	0.651003	0.856414	0.828957	0.923194	0.862445
		22.6733	19.7183	37.2533	18.3786	34.1117	19.285	16.81	49.6683	16.0283		0.702271	1.29933	0.922219	0.705217	0.844101	0.927038	0.821391	0.624395	0.558138		0.800829	0.995387	0.887205	0.784122	0.800831	0.886638	0.765312	0.390344	0.73201
		31.0833	23.44	24.0333	19.0322	58.805	28.6017	20.5167	25.4583	25.9383		0.54468	1.0687	0.735423	0.588767	0.552664	0.748371	0.61132	0.75058	0.909627		0.537725	0.954993	0.803388	0.522216	0.566529	0.870683	0.937089	0.922983	0.930031
		19.335	35.3683	26.255	15.3421	39.2133	35.205	21.9167	23.045	15.0183		0.889818	0.54251	0.806925	1.23913	0.564909	0.528786	0.704226	0.699622	0.66618		0.863827	0.397678	0.871758	0.996785	0.526006	0.473598	0.908642	0.943262	0.919851
		18.0967	22.2983	19.365	19.9187	48.7633	19.3517	25.54	15.78	23.4933		0.70016	1.03989	0.946778	2.15778	0.748943	0.3887	0.678654	0.372596	0.761508		0.859824	0.964792	0.947781	0.969098	0.789167	0.347025	0.694911	0.291168	0.953661
		15.0483	23.0933	25.8083	18.1574	16.155	15.3467	24.12	20.0617	17.8983		1.02605	0.918858	0.38572	1.15012	0.875125	0.609377	0.898559	0.622925	0.699749		0.892282	0.811481	0.310952	0.978667	0.809004	0.43657	0.938176	0.490514	0.919925
		22.64	15.53	17.8033	19.9522	37.7567	17.5483	16.4583	30.4967	17.8917		0.320343	1.00015	0.891017	0.830381	0.456686	1.77296	0.694027	0.484464	0.909779		0.169149	0.934137	0.910142	0.664227	0.385133	0.469973	0.602995	0.492183	0.988981
		21.6917	15.1983	20.665	18.7817	42.9117	31.855	21.1167	29.3483	18.5517		0.550725	0.942032	0.698409	1.02921	0.718553	0.704775	0.58811	0.299671	0.773625		0.515914	0.880815	0.844263	0.979488	0.674823	0.842565	0.517475	0.263051	0.911011
		22.735	18.0533	18.7683	17.2867	29.775	16.3417	15.815	25.7233	16.245		0.369297	0.994094	0.680704	0.634232	0.589019	0.266562	0.810697	0.768586	0.954675		0.316181	0.713185	0.941544	0.905161	0.36931	0.142004	0.968115	0.94739	0.99801
		18.7583	17.61	20.1367	39.8767	16.3083	18.4683	16.6317	17.185	21.14		0.515256	0.923965	0.69232	1.00032	0.587468	0.824838	1.88438	0.605679	1.03533		0.68682	0.917267	0.93031	0.896555	0.471967	0.857996	0.86339	0.559316	0.98032
		24.5567	40.4933	21.5967	19.9867	19.3467	17.4717	26.4567	41.515	21.9767		0.904729	0.450461	0.719844	0.688342	0.933899	0.288704	0.787022	0.640603	0.856939		0.878569	0.476084	0.922698	0.949636	0.876777	0.153287	0.788207	0.907893	0.958448
		22.035	28.88	15.9817	24.9067	17.995	18.8767	16.97	23.5233	25.4		0.83293	0.859464	0.839013	1.02958	0.92108	0.309489	0.48871	0.653437	0.888813		0.863991	0.79838	0.926454	0.966423	0.87925	0.230445	0.438476	0.761256	0.957718
		33.975	36.0433	18.34	16.7217	26.64	17.3933	25.4333	18.1583	34.4567		0.449668	0.746121	0.761222	0.855134	0.341702	0.437284	1.01637	0.503829	0.855251		0.512149	0.708799	0.940708	0.962066	0.240757	0.240599	0.964473	0.455532	0.912458
		23.5517	17.625	25.8783	16.8117	22.0133	20.2917	24.535	18.11	25.595		0.787671	0.984027	0.973218	0.793506	0.753921	1.0176	0.77316	0.49089	0.886404		0.87992	0.928252	0.947468	1.00424	0.919018	0.520122	0.870249	0.670134	0.946507
		26.5033	28.1867	15.1167	20.9467	17.67	25.47	19.8067	17.555	28.8033		0.651452	0.849116	0.961539	0.676759	0.868388	0.835614	0.723156	0.467762	0.845875		0.88152	0.82495	0.93696	0.956231	0.849022	0.733189	0.587123	0.466825	0.958031
		21.7033	32.9333	16.0133	28.015	18.72	46.7367	32.625	17.4733	16.8433		0.690579	0.972067	0.863692	0.779	0.976138	0.609817	0.249003	0.752961	0.910479		0.820122	0.824009	0.909785	0.923827	0.894584	0.858753	0.166236	0.855542	0.987158
		21.625	33.6017	16.3717	32.9233	17.6267	25.7383	25.6383	19.9617	20.3333		0.982994	0.390548	1.71159	0.739985	0.739352	0.600985	0.605423	0.188613	1.15359		0.972556	0.21528	0.97105	0.905103	0.836818	0.727024	0.496019	0.130671	0.942255
		22.4733	25.9983	23.925	23.135	23.8917	18.5867	21.1233	15.6233	19.8983		0.762935	0.749328	0.605548	0.825156	0.734077	0.530554	0.961131	0.850123	0.864719		0.883556	0.680091	0.849007	0.944787	0.884303	0.447189	0.900741	0.86297	0.95602
		23.9833	17.6233	18.6967	16.9033	19.6	20.735	32.5433	15.265	30.6333		0.712218	0.913107	1.02777	0.839618	5.45072	0.793902	0.417038	0.896677	0.995069		0.689122	0.896378	0.991294	0.937942	0.952596	0.749978	0.51435	0.83511	0.920446
		17.8967	19.7467	26.58	28.0583	27.3	16.8683	23.9083	23.6533	32.37		0.775911	2.38765	0.921054	0.735454	0.761266	0.741412	0.66555	0.568583	0.830721		0.843765	0.669974	0.925746	0.930559	0.902595	0.551172	0.654314	0.659	0.922832
		17.7217		15.735	24.3033	27.925	27.68	24.565	42.5067	26.905		0.943986		1.08144	0.800438	0.659052	1.75585	0.320234	0.254652	0.898196		0.928231		1.01376	0.939087	0.811919	0.306794	0.185604	0.221805	0.954612
		20.6517		26.0017	28.4567	16.7183	21.4467	17.2583	31.495	17.3017		0.451007		0.689901	0.719738	0.840098	0.461668	0.90486	0.347618	0.885705		0.468577		0.876316	0.937825	0.860296	0.296196	0.897428	0.276079	0.95072
		21.5033		30.095	21.7383	23.065	17.6017	29.075	33.415	17.685		0.878551		0.687665	0.679815	0.995937	1.11351	0.34851	0.319441	1.86139		0.929045		0.905354	0.90856	0.643134	1.02042	0.283924	0.259586	0.977627
		39.8217		15.425	26.14	27.01	27.43	36.4567	23.8883	15.0883		0.974357		0.849248	0.970828	13.3475	0.853162	0.37337	0.974261	0.570492		0.905269		0.917732	0.940353	0.667398	0.859316	0.302196	0.734224	0.856843
		21.5483		20.8267	17.8333	24.4183	21.1017	30.3133	48.3117	19.26		0.811272		0.632482	0.72859	11.1876	1.00595	0.596179	0.638152	0.77367		0.840975		0.820216	0.956434	0.702337	0.958853	0.662372	0.347758	0.931125
		25.3633		25.305	16.89	30.59	29.2417	17.1633	24.015	28.6617		0.495571		1.02369	0.815007	0.679238	0.792494	0.919205	0.514167	0.742731		0.555996		0.9566	0.949613	0.888564	0.835432	0.909152	0.377201	0.922874
		17.9083		19.925	21.425	21.67	24.2667	15.0217	16.4233	17.4917		0.451827		1.00164	0.813792	0.721312	0.820139	1.01084	0.438269	0.684542		0.354737		0.950915	0.978633	0.847547	0.67598	0.996739	0.317934	0.914579
		18.1267		19.6283	20.0083	18.0233	25.9917	23.9583	18.445	17.425		0.751442		0.825469	0.88396	0.273103	0.498651	0.271037	0.257737	1.47643		0.866251		0.936796	0.976923	0.154715	0.267526	0.175733	0.216744	0.474292
		32.6167		18.835	27.7183	35.22	16.9017	15.3133	28.3017	18.95		0.751217		1.04844	0.700197	0.337211	0.969107	0.916516	0.997755	1.17677		0.878107		0.96434	0.9343	0.220617	0.942211	0.902957	0.950971	0.564024
		15.7667		17.07	15.22	30.2983	30.6883	21.22	43.1883	19.7117		0.288202		1.02293	0.84933	0.657101	0.736422	0.804487	0.504599	0.865467		0.203518		0.963325	0.987225	0.894216	0.802675	0.800022	0.324767	0.95333
		21.29		25.04	15.5067	25.64	24.89	15.9083	42.8267	16.67		0.745571		0.993874	1.04097	0.722157	0.950211	0.813515	0.666045	0.991733		0.827454		0.932598	0.999181	0.644585	0.868466	0.728016	0.431345	0.964047
		17.33		23.3467	17.735	37.9133	16.2633	21.9017	47.9367	19.9383		0.854254		0.709804	0.69189	0.27551	1.05414	0.970427	0.361527	1.03111		0.880018		0.799457	0.928537	0.217938	0.712541	0.95127	0.1725	0.984064
		22.8217		16.585	19.65	22.495	28.7817	20.315	46.295	15.9617		0.905469		0.416639	0.649001	1.51346	2.14017	0.686533	0.402739	0.742956		0.922136		0.411328	0.904875	0.434089	0.58345	0.853202	0.253961	0.92315
		24.7283		17.8733	16.045	21.6183	18.8933	23.2483	16.2567	19.0317		0.698635		0.992763	0.495578	2.83933	1.01012	0.703773	0.667858	0.697796		0.932501		0.954089	0.654884	0.569826	0.91292	0.831518	0.745669	0.919162
		16.6767		19.52	31.6	21.1017	17.4467	46.3617	21.56	20.3517		0.730515		0.989658	0.711946	3.22556	1.92341	0.660579	1.00487	0.66918		0.750652		0.942042	0.946388	0.570717	0.86205	0.790902	0.953674	0.933276
		20.6933		22.635	20.03	41.0233	48.2383	31.0517	22.27	17.6233		0.465658		0.969699	0.640936	0.635827	2.8356	0.879812	0.285248	0.627977		0.558598		0.930426	0.906033	0.525001	0.780787	0.882119	0.270664	0.944709
		15.0933		15.36	19.485	22.4033	17.8267	21.04	19.2333	18.7833		0.661803		0.938257	0.630769	0.817319	0.376252	0.968096	0.401567	0.657465		0.6859		0.931073	0.94869	0.693993	0.258636	0.920098	0.43552	0.922992
		16.24		35.88	16.3767	18.9933	16.6867	24.8817	18.605	17.2367		0.81593		0.870897	0.708089	0.742658	0.826251	0.519797	0.648374	0.752446		0.90287		0.848945	0.874504	0.872929	0.79126	0.438496	0.948924	0.909078
		21.06		25.8833	17.085	16.9033	15.65	37.7233	28.0183	16.3267		0.672055		1.0664	0.855695	0.622245	1.0698	0.771273	0.763836	0.601572		0.879568		0.377639	0.975567	0.559973	1.03287	0.800862	0.576689	0.913981
		15.1033		26.3833	17.6117	23.2333	20.1083	47.0317	26.545	17.04		0.769706		0.755877	0.521336	1.10768	1.02259	0.835839	0.597212	0.855499		0.900523		0.550186	0.697474	0.59011	0.934637	0.853392	0.864421	0.960641
		18.7333		15.7717	16.6917	19.925	27.8583	19.5083	41.35	22.5083		0.476921		0.806064	0.484745	0.968618	1.25546	0.995016	0.610354	0.70386		0.524336		0.884603	0.63592	0.897413	0.311973	0.973317	0.867992	0.928934
		19.2817		21.905	18.5533	20.3483	30.21	19.5433	24.9367	15.25		0.927053		0.750615	0.720976	0.645371	0.698547	0.944825	0.577902	13.222		0.946534		0.767182	0.889914	0.701369	0.579418	0.913641	0.924718	0.96797
		20.185		22.8	22.0383	45.0917	24.825	18.5467	19.0417	17.775		0.795314		0.524927	0.699979	0.581624	0.947755	0.996237	0.677414	0.735805		0.825116		0.563857	0.847013	0.725878	0.902309	0.945025	0.395048	0.930715
		19.515		16.0083	16.015	19.1233	28.8567	17.79	37.4133	17.2733		0.559607		0.881576	0.586657	0.936654	0.600528	0.618451	0.583929	1.11619		0.608917		0.864693	0.791382	0.704419	0.52154	0.862723	0.848174	1.02718
		21.6783		18.0783	19.8983	26.4267	30.4567	19.56	24.2033	23.76		0.851073		0.973999	0.800592	0.727062	0.381783	0.929811	0.863186	0.38694		0.921017		0.950034	0.693377	0.876783	0.243497	0.944206	0.921481	0.396113
		17.285		20.2333	17.4033	17.0333	22.5	17.155	24.16	21.0633		1.11985		0.963882	0.758509	0.795366	0.868124	0.729666	0.349186	0.616994		0.487903		0.939083	0.942259	0.631003	0.882028	0.794902	0.296019	0.514783
		22.0217		16.975	39.0833	20.2533	25.345	63.1917	17.1767	15.6533		0.40685		0.940664	0.748532	0.310213	0.832929	0.754299	1.19556	0.791303		0.494207		0.901587	0.913248	0.240497	0.855285	0.817326	0.740451	0.693568
		18.46		26.6167	32.1383	28.5717	25.595	17.8867	28.0817	20.4833		0.80673		0.917907	0.848917	0.960319	0.323246	0.95431	0.851383	1.01313		0.918076		0.882468	0.951815	0.855433	0.299585	0.926656	0.903996	0.966155
		24.9967		25.355	17.9967	28.285	27.89	23.6317	16.9167	22.84		0.684636		0.907173	0.561909	0.224488	0.867615	0.96684	1.20372	0.652219		0.76725		0.856095	0.723893	0.15123	0.843137	0.944251	1.03331	0.850827
		28.655		35.2817	17.4483	16.0783	15.4317	17.4	25.07	27.2		0.631474		0.707025	0.617434	1.25085	7.16813	1.0403	0.613284	0.745437		0.817857		0.854086	0.861609	0.53903	0.979636	1.00207	0.792057	0.810194
		22.9167		32.545	16.7967	21.2467	21.1717	37.9683	19.6433	18.8633		0.831142		0.830893	0.759278	0.764676	0.279817	0.615862	0.867944	0.753036		0.876191		0.879808	0.96163	0.784659	0.259918	0.831171	0.9223	0.75426
		22.18		25.06	28.4417	30.6283	26.7833	21.7683	24.9333	20.1433		0.718133		0.864793	0.805778	0.564033	0.652854	0.447021	0.80647	0.342126		0.801818		0.869371	0.947215	0.67849	0.630395	0.529004	0.830674	0.354866
		23.5433		43.8267	15.2467	22.3617	30.555	29.8683	15.3933	16.6983		0.83221		0.812917	0.839144	0.288184	0.851195	0.595802	0.720743	0.56185		0.942912		0.856634	1.00098	0.182867	0.939734	0.73806	0.566106	0.697101
		22.5833		25.2867	15.7583	18.19	17.645	19.505	23.305	28.0267		0.776953		0.902732	0.249519	1.05825	0.773151	0.941096	0.745823	0.700774		0.887688		0.884733	0.0858378	1.00117	0.718092	0.899839	0.93591	0.636425
		19.7317		18.455	15.1567	45.5483	17.2517	26.0533	19.995	17.4833		0.431963		0.674665	0.768999	0.560527	0.938632	0.959389	0.576461	0.527674		0.477371		0.700019	0.964224	0.785361	0.938018	0.910178	0.915435	0.659357
		15.5783		20.11	16.1183	17.915	19.1633	15.175	22.3333	17.7917		0.924064		0.986494	1.09249	0.508082	0.839914	1.0315	0.577186	0.551945		0.905109		0.953718	1.02357	0.446921	0.778789	0.991741	0.875402	0.591241
		17.4667		19.17	16.5833	22.2267	25.7733	21.17	15.2433	20.5767		0.980853		0.894055	0.812305	0.908531	0.474399	0.541586	0.954336	0.55826		0.956773		0.890848	0.80477	0.87457	0.33743	0.770979	0.860284	0.376883
		22.77		20.195	21.45	16.755	18.285	23.6917	21.1833	15.8383		0.396964		0.8651	0.915778	1.81118	0.835749	0.604659	0.559378	0.799836		0.314673		0.89786	0.990226	0.677592	0.862186	0.895855	0.538477	0.721817
		24.5067		23.5133		18.3117	28.7417	18.2017	38.1133	31.5833		0.409404		0.40663		1.41864	0.728901	0.288282	0.998368	0.335451		0.398164		0.348589		0.809625	0.88185	0.231	0.893563	0.30354
		24.0533		24.585		20.8983	21.7717	20.7967	16.1233	32.4833		0.807356		0.502805		0.887484	0.847914	0.700478	0.796822	0.221597		0.841301		0.489394		0.90304	0.889	0.84886	0.660319	0.224557
		17.79		31.6433		33.5217	21.745	25.71	31.5417	30.8083		0.988417		0.73037		0.501942	0.750168	0.868666	0.826998	0.654135		0.90676		0.915903		0.572395	0.705085	0.89806	0.579746	0.873317
		15.6817		17.53		23.5333	43.1017	22.4983	29.11	17.63		0.521393		0.539943		0.30642	0.664728	0.57721	0.656827	0.678368		0.611786		0.606678		0.254304	0.87225	0.561723	0.220668	0.561256
		18.375		22.7833		67.2967	16.4183	56.6583	23.2417	17.3633		0.928389		1.0295		0.453546	0.878068	0.714396	1.02726	1.0525		0.968156		0.963124		0.534117	0.823009	0.806133	0.965897	1.00844
		15.1767		18.1583		18.0533	21.7067	21.1433	15.8517	26.9517		0.239246		0.645255		0.901443	1.90467	0.889625	0.892683	0.217664		0.163698		0.89576		0.80938	0.908653	0.942284	0.667338	0.124938
		18.4567		38.81		60.775	17.6417	15.195	26.25	16.8517		0.638		0.996626		0.431373	0.984619	0.864994	0.581468	0.735992		0.708961		0.890233		0.465334	0.941798	0.870678	0.778765	0.628008
		17.325		21.4733		51.2317	16.1917	24.6367	25.4517	21.5467		0.244053		1.11887		0.380528	0.714114	0.837268	0.586661	0.876347		0.164802		1.00157		0.215358	0.472707	0.886684	0.792632	0.900782
		21.9583		15.905		21.7533	35.93	20.4683	19.37	16.0583		0.43973		0.301178		1.03553	0.749569	0.324712	0.564945	0.90232		0.451279		0.276966		0.973024	0.9114	0.213272	0.557686	0.887319
		16.6317		18.5533		19.9667	15.75	28.09	17.2967	34.6283		0.310718		1.00334		1.51888	1.06884	0.748178	0.21155	0.49443		0.290921		0.972264		0.797936	0.994528	0.866322	0.181242	0.685812
		15.955		17.2717		38.9617	16.95	25.06	15.1017	17.1833		0.304318		0.431158		0.76181	0.739418	0.958519	0.711394	0.916925		0.271246		0.328257		0.67953	0.657684	0.912988	0.715875	0.935306
		18.545		15.1567		27.835	24.02	15.8417	23.73	47.1317		0.859952		0.722826		1.42068	0.766116	0.976941	0.871734	0.977143		0.789502		0.877932		0.7538	0.855201	0.917632	0.839227	0.875171
		26.015		27.005		22.2183	25.9333	16.8533	21.55	15.0833		0.781779		0.974451		0.805493	0.569812	0.733348	0.57664	0.809615		0.873194		0.947344		0.667072	0.571553	0.767848	0.687296	0.735788
		22.565		15.6317		19.0167	15.485	16.3867	18.3883	38.105		0.938368		0.614026		0.940611	0.367402	0.463933	0.708091	0.657706		0.918356		0.787977		0.87257	0.340242	0.397417	0.794029	0.663153
		21.8917		15.12		40.2233	18.8867	32.7517	26.645	17.3317		0.640351		0.610075		0.40987	0.498794	0.845904	1.01522	0.774629		0.614992		0.650362		0.44846	0.526391	0.834737	0.962518	0.708155
		15.5683		23.5683		40.1933	37.0167	20.7133	18.4283	16.4483		0.564177		1.19324		0.370618	0.888063	0.983934	0.65377	0.644837		0.736912		0.909724		0.241519	0.742022	0.937714	0.573872	0.519442
		29.4017		16.515		17.1983	21.1683	15.4067	17.5583	22.3483		0.58076		0.486414		0.889271	0.417281	0.332841	0.331545	0.771794		0.761518		0.546486		0.832688	0.313742	0.26138	0.219154	0.75985
		28.355		32.7217		62.4633	23.04	37.58	19.6433	15.035		0.572081		0.667144		0.193801	0.938737	0.615055	0.351839	0.570378		0.609537		0.914094		0.130435	0.911723	0.718711	0.23939	0.485296
		17.9183		15.6883		41.2717	29.7683	23.9583	15.6817	35.0417		0.326754		0.18853		0.223898	0.35612	0.917289	0.636331	0.233122		0.235502		0.138232		0.124678	0.300751	0.875506	0.85259	0.155138
		17.1467		15.86		40.3017	29.0233	36.9167	31.6783	16.2167		0.967355		0.684133		0.649035	0.285727	0.928318	0.702311	0.855819		0.930907		0.761004		0.807849	0.203648	0.867416	0.925294	0.86274
		17.5967		15.9967		41.59	16.1517	29.3483	41.57	17.59		0.984389		0.761968		0.550391	0.393774	0.751062	0.750159	0.946862		0.937159		0.659145		0.519845	0.293031	0.936469	0.87956	0.877037
		21.2633		33.39		47.215	21.1383	29.5	36.2783	20.6967		0.95448		0.64805		0.530784	1.03076	0.797156	0.741619	0.39977		0.924076		0.768774		0.447144	0.978217	0.849255	0.903628	0.276286
		28.375		33.88		66.0017	18.2133	56.3833	19.0967	15.9783		0.74221		0.634569		0.215481	0.423263	0.667872	0.78586	0.50434		0.715341		0.750636		0.138876	0.477826	0.8224	0.869797	0.430943
		27.7133		18.0967		23.9083	21.28	25.1033	17.8233	16.5867		0.585224		0.566517		0.550329	0.95543	0.491159	0.72216	0.817446		0.721243		0.70621		0.348292	0.860804	0.41013	0.864083	0.883531
		16.575		19.5683		37.955	18.4417	34.6717	20.5733	26.0967		0.686039		1.02243		0.910105	2.01042	0.903388	0.407073	0.61844		0.840761		0.976938		0.833727	0.392343	0.906248	0.31036	0.917133
		30.5617		19.38		17.2567	23.39	23.1217	28.8367	22.135		0.611965		0.567964		0.93431	1.06625	0.967488	0.6125	1.02058		0.741757		0.471641		0.913731	0.70647	0.917705	0.79452	0.96383
		19.765		25.2233		15.7483	27.7267	16.77	21.84	25.7733		0.850384		0.422739		0.920756	0.857179	0.9188	0.36606	0.785967		0.890776		0.384131		0.830601	0.862428	0.882931	0.298024	0.875414
		31.235		17.2017		40.5	29.3917	50.8583	30.615	24.1883		0.759007		1.06632		0.742188	0.869014	0.699008	0.93971	0.482697		0.903009		1.00204		0.60856	0.844391	0.820622	0.889013	0.465987
		19.245		15.2017		32.2783	20.8433	60.325	27.3667	24.93		0.275742		1.11211		0.204311	1.32648	0.738246	0.686136	0.340579		0.171907		1.01497		0.130799	0.208634	0.82069	0.756143	0.349708
		18.785		17.5267		29.455	25.28	23.2267	21.39	15.8433		0.459523		0.705948		0.786168	0.683385	0.882025	0.337879	0.91503		0.451906		0.737736		0.603073	0.758624	0.885487	0.268075	0.86048
		19.485		26.2583		25.8283	18	35.85	28.715	15.155		0.926683		0.695514		0.954715	1.0008	0.68678	0.770788	0.645804		0.921424		0.775888		0.86243	0.952013	0.745007	0.827305	0.584348
		23.0867		17.7567		16.125	24.2633	47.7	18.0117	21.3483		1.01828		0.669419		0.45383	0.943456	0.669211	1.84133	0.343598		0.965547		0.88947		0.288766	0.569857	0.767109	1.00713	0.258694
		18.9367		22.145		18.255	20.0933	25.185	31.1967	25.685		0.794798		0.775897		0.839935	0.924056	0.916995	0.710808	0.734928		0.879426		0.858028		0.743351	0.787813	0.879858	0.828026	0.698508
		16.9867		19.625		28.91	19.5517	25.7567	20.9367	20.8417		0.311618		0.5061		0.191309	0.445737	0.282769	0.21653	1.01413		0.231461		0.626024		0.118605	0.29363	0.177119	0.126306	0.966076
		23.8467		23.1667		17.6	29.5883	20.0883	21.3517	25.8767		0.803846		0.809739		1.00113	0.609297	1.06358	0.703592	0.919535		0.868066		0.915452		0.944714	0.714409	0.99279	0.787776	0.852828
		15.295		25.5283		23.97	38.195	20.2967	15.705	38.1167		0.77966		0.800699		0.902561	0.642225	0.462841	0.820519	0.885447		0.863983		0.908827		0.809771	0.890511	0.488553	0.806325	0.814129
		18.69		15.2833		42.3867	27.78	24.6967	18.9433	25.68		0.570821		1.2771		0.388724	0.381726	0.830635	1.84387	0.387009		0.732672		1.04956		0.224152	0.295806	0.867415	0.492452	0.318856
		15.2617		17.6		30.1633	15.0333	43.635		36.9067		0.688595		0.754387		0.201157	1.00582	0.587897		0.526454		0.867993		0.783874		0.114094	0.913928	0.748368		0.631782
		18.2517		16.8683		28.5633	19.515	24.7783		32.715		0.884463		1.16311		0.240797	0.999134	0.826436		0.912544		0.960621		0.896485		0.155726	0.958239	0.861386		0.865622
		17.0617		18.1617		21.03	18.3217	20.2367		32.8433		0.420106		0.722704		0.949583	0.734275	0.346826		0.782577		0.282529		0.78333		0.905983	0.710671	0.244851		0.780558
		19.4533		27.2433		22.4633	45.6033	23.0417		16.4867		0.33764		0.709656		0.755345	0.650963	0.833264		1.02234		0.300581		0.835945		0.76781	0.810779	0.842263		0.984624
		19.42		15.0767		44.905	34.3383	25.81		22.81		0.200164		1.84702		0.373301	0.748992	0.667222		0.707951		0.168643		0.379801		0.301997	0.778871	0.909436		0.678764
		19.2383		17.4733		22.9433	24.145	20.0833		26.5083		0.933498		1.13084		0.349204	0.565665	0.924783		0.413407		0.883581		0.950025		0.208988	0.408821	0.965059		0.393759
		20.9267		19.3717		55.9717	22.3417	21.895		50.5317		0.903551		0.976313		0.446031	0.964659	0.648122		0.821913		0.955471		0.843487		0.267994	0.873578	0.898392		0.825793
		38.9083		32.665		62.5183	30.9933	17.385		29.9583		0.633607		0.808494		0.427102	0.900037	0.721739		0.571079		0.85102		0.879073		0.338312	0.852458	0.670741		0.582406
		21.0083		16.475		47.2883	19.1683	38.5183		43.845		0.411875		0.543602		0.395591	0.76398	0.986758		0.748236		0.402726		0.637754		0.434269	0.672528	0.89927		0.79281
		17.5867		30.41		30.67	22.3583	30.4		27.6967		0.769295		0.547362		0.213857	0.619931	0.379938		0.700633		0.861713		0.772939		0.130064	0.539169	0.385472		0.774521
		17.3383		29.1483		15.5317	18.25	26.7383		40.1133		0.300563		0.823885		1.05579	0.917463	0.208474		0.879289		0.191678		0.889324		0.97088	0.916532	0.172516		0.849074
		18.16		25.5633		15.865	22.1317	17.15		27.885		0.329716		0.909891		0.997006	1.07203	0.676104		0.900731		0.259163		0.918096		0.92132	0.982929	0.558379		0.833497
		17.13				17.0317	24.2583	16.0317		32.0033		0.745215				0.81023	1.09194	0.730554		0.445674		0.846282				0.653246	0.953792	0.58167		0.414211
		26.7583				79.1867	16.52	20.555		24.735		0.483597				1.1866	0.51595	0.746092		0.977238		0.519391				0.37487	0.369444	0.637489		0.940634
		17.04				21.535	24.6	40.7517		34.96		0.225715				0.9555	0.424924	0.581849		0.637094		0.162496				0.905798	0.362455	0.665176		0.640461
		21.94				29.8867	19.3067	41.335		17.6917		0.571362				0.785115	0.774696	0.537799		1.22782		0.730182				0.607904	0.740754	0.662302		0.696469
		20.4817				25.3267	33.8617	25.6533		17.1917		0.81503				0.643929	0.934973	0.711843		0.833324		0.850771				0.712866	0.887833	0.8358		0.858755
		17.9233				18.3717	17.895	23.4033		15.47		0.460658				0.96583	0.624976	1.11352		1.0181		0.399402				0.881413	0.596427	0.999738		0.927005
		25.8833				44.29	23.4017	24.925		19.9		0.831079				0.574117	0.633387	0.887235		0.768936		0.897403				0.557678	0.535089	0.888481		0.862525
		17.9933				20.12	23.6	21.9483		37.9417		0.898184				0.986229	0.484722	0.834461		0.872999		0.940824				0.927178	0.318139	0.840758		0.765014
		15.9433				52.31	25.9967	19.6		18.7067		0.782702				0.252293	0.706308	0.416703		1.09514		0.850365				0.105137	0.616265	0.325356		0.7075
		17.97				18.9483	15.145	19.5867		16.7617		0.857766				0.994985	0.977489	0.937908		1.08328		0.895044				0.9339	0.938687	0.912214		0.869233
		19.8767				29.81	25.945	19.2967		25.8683		0.867043				0.65162	0.447874	0.424989		0.65922		0.936131				0.451374	0.265323	0.324349		0.832199
		15.9367				44.1533	15.8717	15.645		15.18		0.663335				0.235962	0.93197	0.910299		0.463138		0.705324				0.126358	0.948201	0.888022		0.388007
		15.8633				22.7717	17.255	24.0617		19.95		0.52535				0.869093	0.98426	0.285799		0.870394		0.654269				0.768205	0.962945	0.26746		0.921774
		27.1933				35.57	16.7983	19.4217		25.015		0.785343				0.579355	0.898579	0.514566		0.963336		0.920022				0.386655	0.857701	0.432261		0.946891
		21.2433				16.8383	33.84	37.12		22.5533		0.802461				0.941562	0.939834	0.302178		0.699789		0.892614				0.900843	0.911998	0.220954		0.881389
		15.565				31.73	44.0417	16.9133		19.4967		1.02744				0.721608	0.617154	0.844344		0.679565		0.996074				0.696381	0.727862	0.769259		0.828571
		24.6167				20.0083	23.275	25.7533		17.7367		1.04592				0.464533	0.816139	0.488801		0.801321		0.966202				0.284097	0.856433	0.360872		0.854595
		39.2033				20.2633	16.4267	21.8017		19.6183		0.632744				0.287619	0.57497	0.561644		0.451303		0.732279				0.135275	0.612349	0.572656		0.599676
		27.3383				29.5333	24.5833	17.8083		15.0867		0.760188				1.13208	0.410104	0.820383		0.558624		0.854757				0.875687	0.355174	0.73917		0.611578
		15.5183				28.2883	20.305	36.2433		16.2		0.879417				1.50922	0.827707	0.661765		0.770464		0.868004				0.888236	0.836495	0.688519		0.689725
		15.93				21.4883	15.6717	43.695		22.6233		0.828661				1.02008	0.998024	0.613179		0.732148		0.795808				0.957105	0.98426	0.713003		0.873035
		21.8017				27.4917	15.865	25.2617		24.2617		0.434462				0.979733	0.395138	0.779816		0.444892		0.354463				0.896688	0.394846	0.791939		0.399843
		16.9183				19.1883	27.4617	24.6067		16.8433		0.684602				0.956422	0.690201	0.415878		0.558755		0.565285				0.90161	0.831807	0.410771		0.59828
		16.075				30.2867	30.9883	24.22		24.5583		0.95495				0.338726	0.36268	1.0163		0.291225		0.938733				0.273992	0.319057	0.948872		0.224792
		21.0917				19.7683	22.895	33.3233		17.0933		0.893129				0.937221	0.817898	0.268401		0.734635		0.904841				0.847649	0.768306	0.223003		0.721556
		24.585				68.4083	20.6383	25.2517		20.6667		0.44685				0.551155	0.817792	0.483978		0.862894		0.378047				0.817311	0.758705	0.603554		0.44838
		16.385				18.53	20.9183	15.57		20.16		0.1622				6.70147	0.555982	0.93415		0.848619		0.116501				0.965535	0.715487	0.949779		0.908568
		22.7567				26.4917	28.0883	15.64		16.565		0.916288				6.8415	0.871812	0.870488		0.864805		0.897407				0.939484	0.833312	0.825199		0.626361
		25.94				64.1317	26.5733	19.005		40.5517		0.903624				0.370734	0.333097	0.957086		0.331198		0.90718				0.230066	0.36781	0.982856		0.367966
		36.3567				34.2617	19.7217	19.2		34.8633		0.709909				0.602316	0.901922	0.194908		0.150534		0.870362				0.46837	0.806788	0.102244		0.0824269
		17.11				16.2383	37.6	20.085		24.5883		0.508287				0.768711	0.746701	0.769923		0.941416		0.482815				0.631221	0.786972	0.812753		0.89134
		17.2933				34.3933	16.5683	29.5267		34.7433		0.668888				0.785158	0.839497	0.953486		0.158825		0.679387				0.452588	0.764314	0.928773		0.0870381
		15.675				43.97	30.275	16.9367		29.2533		0.346313				0.298691	0.784452	0.597591		0.478467		0.233629				0.166039	0.770107	0.592038		0.277789
		15.9867				59.2583	31.85	16.9383		17.8833		0.818715				0.521597	0.657151	0.220236		1.03614		0.834725				0.412351	0.765189	0.132431		0.990409
		18.3883				59.8117	23.275	15.9683		16.735		0.756727				0.452439	0.705856	0.462305		0.35485		0.783348				0.486073	0.86298	0.387369		0.19214
		16.4367				25.7083	21.3617	16.4883		17.565		0.795152				0.872638	0.930635	0.378482		0.411646		0.851979				0.762829	0.900702	0.270021		0.32019
		27.3133				19.96	28.4017	37.7083		21.8233		0.789443				1.00027	0.920168	0.638052		1.10475		0.945436				0.906095	0.877257	0.905603		0.995
		25.09				16.5167	21.9383	22.59		18.7567		0.368702				1.00209	0.880984	0.864153		1.70457		0.276895				0.948864	0.852578	0.834793		0.831937
		17.0067				21.2117	28.9617	26.215		15.4567		0.880629				1.05342	0.663978	0.799458		1.23717		0.930245				0.891071	0.711326	0.878106		1.04376
		19.0267				62.6617	39.2683	15.595		19.0867		0.921524				0.737579	0.435377	0.751873		0.947241		0.955677				0.420805	0.373889	0.675557		0.872848
		24.645				28.7183	23.2983	26.9983		16.1933		0.92059				0.231972	0.945593	0.261373		1.07543		0.950701				0.0998636	0.91789	0.198993		1.00833
		20.17				28.4683	34.3567	15.94				0.726969				0.323548	0.898301	0.81733				0.764529				0.190432	0.862741	0.801378
		18.14				23.9867	31.065	15.9833				0.833288				0.688018	0.504394	0.95246				0.878617				0.577639	0.448124	0.888145
		20.4783				44.0783	55.9433	18.79				0.265698				0.423569	0.736917	0.587617				0.183071				0.411147	0.805993	0.690598
		17.8533				30.5733	20.6233	18.555				0.946034				0.290381	0.980735	1.00258				0.962599				0.180508	0.956942	0.897578
		16.045				19.2033	35.2133	30.6583				0.503224				0.698543	0.52215	0.55922				0.49207				0.542677	0.474364	0.360909
		32.9217				26.51	15.17	15.7917				0.888887				0.858214	0.894404	0.925693				0.792556				0.728607	0.845123	0.926826
		21.2367				40.9533	22.985	23.5517				0.790372				0.482187	0.840265	0.866683				0.864245				0.441072	0.845625	0.892848
		23.99				29.1233	18.2167	55.7317				0.624106				1.0977	0.980428	0.728928				0.899527				0.658782	0.939744	0.769402
		25.8367				38.9017	22.0467	36.7817				0.586305				0.760665	0.977149	0.486583				0.894713				0.646934	0.899584	0.408676
		15.47				20.53	16.1833	18.2				0.251694				1.01948	0.944123	0.873651				0.141415				0.924275	0.917609	0.899545
		17.8617				16.0783	26.69	20.975				0.353603				0.97657	0.387566	0.291939				0.357527				0.893948	0.335046	0.179636
		16.3383				43.47	26.215	27.4267				0.34115				0.902275	0.195734	0.651533				0.281088				0.781171	0.127521	0.709096
		20.145				45.3817	24.0733	17.05				0.322288				0.730257	0.93911	0.635332				0.233538				0.762435	0.897347	0.562256
		33.7567				44.605	22.235	27.7433				0.65537				0.75719	1.00723	0.353245				0.886783				0.772236	0.971159	0.291677
		16.0467				51.545	17.3033	34.7433				1.03721				0.349276	0.979934	0.564844				0.982194				0.248271	0.964942	0.632848
		35.4567				18.31	23.0633	25.8083				0.685738				0.873069	0.370533	0.90364				0.909506				0.844652	0.298212	0.890837
		16.4867				64.6567	20.6067	38.335				0.866585				0.27983	0.408255	0.25625				0.946171				0.197648	0.361086	0.165695
		31.8733				15.2533	49.1317	15.57				0.91649				0.962903	0.784912	0.949256				0.816447				0.910179	0.638064	0.936111
		17.5283				48.0933	15.4617	15.18				0.992265				0.519827	1.10855	0.703642				0.467381				0.563143	0.858706	0.606783
		26.1683				84.6233	54.6467	20.4317				0.917853				0.28864	0.711177	0.242745				0.828816				0.172502	0.626239	0.101704
		21.125				40.9133	24.075	26.7117				0.819065				0.696187	0.96633	0.625307				0.834652				0.622573	0.895546	0.918073
		36.4133				33.675	17.4233	30.0733				0.914685				0.292745	1.02098	0.716968				0.854065				0.194023	0.977445	0.928928
		19.705				42.9383	19.0133	17.5883				0.886897				0.369676	1.09101	0.223679				0.934083				0.327803	0.972722	0.155994
		23.575				32.3383	20.7117	22.695				0.723709				0.79834	1.57004	1.04414				0.869854				0.805575	0.787752	0.979604
		17.01				51.7433	16.5583	15.8483				0.749381				0.472429	1.00553	0.233337				0.765633				0.597145	0.985903	0.194468
		47.765				35.47	18.3833	28.2917				0.7495				0.175887	1.02235	0.347861				0.856499				0.123505	0.963619	0.290631
		25.445				24.0733	56.235	15.3383				0.324263				0.870146	1.04704	0.851643				0.262869				0.783267	0.516186	0.806422
		29.0267				47.4333	24.4417	42.3033				0.72241				0.387691	1.0165	0.872784				0.891717				0.427385	0.95596	0.810424
		24.8033				19.6083	17.19	20.2167				0.847397				0.38347	0.683226	0.817129				0.920839				0.262426	0.645856	0.595684
		18.0767				27.0317	31.6983	71.7183				0.907311				0.715516	0.44782	0.698584				0.93327				0.779062	0.287829	0.655956
		15.0717				35.4383	24.2383	56.45				0.479572				0.518821	0.275323	0.690919				0.49049				0.365234	0.20634	0.573506
		39.0783				18.76	26.4367	38.5617				0.599907				0.624211	0.727197	0.5382				0.76848				0.466343	0.667876	0.560237
		20.4167				51.81	21.3767	29.5783				0.493047				0.223381	0.176276	0.851082				0.327286				0.191009	0.101742	0.741085
		15.1133				23.785	24.01	15.575				0.83541				0.240979	0.707712	0.403785				0.873121				0.121804	0.694781	0.368905
		19.26				20.51	15.6567	17.2167				0.936739				0.785964	1.04547	0.329374				0.964609				0.650156	0.994193	0.290661
		21.5817				41.3133		16.5117				0.770965				0.750501		0.174695				0.855169				0.829806		0.113756
		20.8417				20.9233		43.3117				0.56251				0.901879		0.602664				0.670845				0.892547		0.464562
		18.3883				29.8717		27.7283				0.52072				0.719606		0.838948				0.512812				0.806397		0.724332
		16.155				17.0317		45.6167				0.592044				0.961717		0.658447				0.642227				0.918587		0.633367
		16.2567				26.8617		31.3917				0.306364				0.45558		0.528695				0.208349				0.496816		0.521401
		15.53				18.08		23.5167				0.488224				0.879636		0.729211				0.419163				0.860051		0.648483
		17.7567				19.9033		25.65				0.561063				0.230264		0.362241				0.511562				0.120699		0.408026
		15.3983				15.0183		20.07				0.368661				0.540438		0.772817				0.255601				0.369413		0.795498
		19.64				44.8217		18.8417				0.386318				0.342156		0.973436				0.232019				0.373988		0.943263
		17.225				17.4233		25.44				0.406791				0.69079		0.661511				0.453606				0.497261		0.596762
		26.585				30.6833		18.36				0.48051				0.348191		0.830323				0.615081				0.161855		0.918737
		20.885				15.4733		22.1033				0.257937				0.883437		0.3879				0.188677				0.863437		0.365528
		20.7717				38.5933		16.36				0.186259				0.172337		0.487555				0.122018				0.0929595		0.314729
		28.41				33.6083		17.5717				0.700364				0.577854		0.997619				0.920478				0.4004		0.962917
		22.2617				17.2233		31.34				0.862026				0.691162		0.54185				0.931572				0.499838		0.719244
		17.8667				28.5767		15.6883				0.925269				0.255727		0.700767				0.938003				0.106297		0.627436
		20.0833				22.425		20.2833				0.442959				0.313194		0.786979				0.407312				0.169511		0.811882
		16.3683				48.6667		15.555				0.313922				0.499037		0.866067				0.255354				0.606079		0.895863
		25.0133				32.1833		22.1983				0.580696				0.728263		0.214647				0.751474				0.768551		0.125884
		19.735				24.3383		21.3917				0.40743				0.883061		0.230058				0.459513				0.901745		0.0844862
		15.2533				15.57		19.4683				0.969153				0.901244		0.338903				0.953947				0.841167		0.315029
		16.5033				35.6083		15.2883				0.984291				0.583817		0.197034				0.989524				0.599134		0.11547
		16.3117				75.6783		29.9017				0.957933				0.441001		3.81802				0.967057				0.310594		0.925722
		21.18				52.605		21.53				0.393257				0.232979		0.578603				0.375465				0.144682		0.794706
		15.8567				21.185		17.0917				0.889517				0.894225		0.859492				0.963832				0.841742		0.890983
		23.695				57.7533		15.6033				0.788598				0.490556		0.610339				0.957195				0.455117		0.86004
		17.6733				36.4983		18.08				0.638051				0.477151		0.651051				0.646792				0.483504		0.875373
		22.5883				15.7567		19.1017				0.720986				0.98296		0.684115				0.767855				0.877763		0.862859
		15.4017				17.4083		16.87				1.12018				0.93699		1.14764				1.00742				0.805271		1.03992
		22.61				15.945		16.1833				0.365463				1.0186		0.788629				0.3556				0.954293		0.908868
		32.0683				20.515		21.2983				0.81017				0.172478		0.607959				0.876694				0.100771		0.838601
		22.4617				22.5183		26.4367				0.620005				0.723612		1.20143				0.777782				0.514865		0.8938
		21.74				33.7233		24.655				0.59881				0.240042		0.529798				0.754047				0.128089		0.481316
		21.2317				39.9967		19.4533				0.897824				0.594063		1.05946				0.976905				0.884557		0.998664
		20.6133				21.49		16.0767				1.50226				0.708466		0.884197				0.624094				0.707173		0.912136
		15.07				23.865		15.2433				0.966107				0.788814		0.96549				0.96394				0.595269		0.988793
		23.1267				41.7383		35.4367				0.522762				0.420324		0.582358				0.649676				0.535005		0.85835
		23.025				16.5917		18.5533				0.977804				0.196063		0.331383				0.964297				0.102766		0.282613
		17.74				30.2267		17.2767				0.714151				0.635939		0.933391				0.852437				0.796539		0.964252
		26.015				18.9383		26.3283				0.582904				0.496341		0.586851				0.633783				0.34646		0.774809
		20.7417				15.6067		18.7483				0.382058				1.08806		0.959462				0.268529				1.02837		0.926765
		27.2567				33.495		39.82				0.806103				0.161898		0.679283				0.888359				0.0854113		0.836034
		15.3983				44.555		16.535				1.048				0.568415		0.471313				1.01808				0.799416		0.611008
		22.5133				24.6817		35.7183				0.800101				0.135435		0.730387				0.910893				0.0846572		0.925187
		42.3167				17.6567		15.3083				0.712069				0.145259		0.935168				0.903079				0.079115		0.965611
		19.97				24.5667		16.9917				0.947475				0.153276		1.19434				0.946141				0.113396		0.996165
		16.885				24.6317		16.775				0.854376				0.156841		0.926595				0.854994				0.118461		0.946964
		15.5783				19.135						0.429952				0.781052						0.382454				0.776386
		44.1433				23.565						0.691585				0.281953						0.896923				0.127129
		24.915				27.485						0.838974				0.514117						0.894747				0.530519
		25.7317				23.3383						0.790062				0.33491						0.885273				0.181737
		17.4917				27.6467						0.924507				0.657503						0.942632				0.741892
		22.525				28.1217						0.90854				0.483618						0.953768				0.324509
		15.89				15.04						0.951953				0.685698						0.979077				0.535756
		35.005				27.5583						0.841796				0.134165						0.916472				0.0746889
		22.2517				20.4567						0.454029				0.853655						0.448024				0.890086
		23.3233				54.2817						0.629404				0.546199						0.590579				0.815839
		19.0017				33.1417						0.40668				1.12188						0.348393				0.66659
		23.5967				27.175						0.330907				0.231856						0.241128				0.118289
		28.5867				26.7483						0.825893				0.220196						0.889061				0.109034
		19.075				48.5383						0.381476				0.56609						0.290465				0.813155
		26.0483				40.0583						0.736455				0.53726						0.851376				0.674204
		19.8933				27.645						0.433679				0.293472						0.512456				0.183966
		15.3317				29.685						0.2771				0.337355						0.162914				0.16822
		18.9217				44.8783						0.860348				0.483762						0.901836				0.65391
		26.7033				30.02						0.928491				0.145694						0.928942				0.0641275
		17.5483				26.0483						0.975672				0.297654						0.959151				0.122465
		29.1883				22.4767						0.819981				0.643478						0.892306				0.601197
		29.7983				29.17						0.679546				0.31993						0.877806				0.152254
		23.1917				15.71						0.87024				0.787927						0.902485				0.598128
		23.7517				41.2783						0.886285				0.349164						0.910238				0.148364
		32.8583				34.1917						0.802717				0.605311						0.870345				0.371956
		53.6167				20.2167						0.748638				0.272632						0.841572				0.117974
		26.2633				39.645						0.764225				0.408052						0.855716				0.474057
		19.485				36.555						0.512329				0.468216						0.532679				0.593778
		31.4567				30.195						0.673785				0.516488						0.910098				0.56481
		29.435				39.2533						0.691765				0.553468						0.912606				0.425677
		17.4833				17.9917						0.261504				0.947761						0.179187				0.869372
		16.3567				28.5517						0.354663				1.09353						0.287378				0.960729
		36.0117				24.11						0.777171				0.874629						0.935665				0.800828
		16.6033				26.7133						0.324111				0.672172						0.253906				0.541135
		16.8033										0.329717										0.248131
		15.8583										0.837995										0.82174
		36.8817										0.765738										0.881135
		20.455										0.565604										0.611948
		24.5417										0.69726										0.820406
		18.4383										0.487232										0.564721
		15.4733										0.395226										0.298874
		37.0417										0.722193										0.867682
		40.2567										0.758285										0.855762
		37.9467										0.619705										0.851664
		22.185										0.883548										0.903164
		20.5483										0.333202										0.228007
		15.2767										0.937311										0.954779
		18.855										0.838681										0.864281
		19.2										0.488546										0.385163
		18.3183										1.01747										0.974454
		15.6033										0.889563										0.874143
		37.875										0.737434										0.85382
		22.3833										0.813772										0.905311
