# Supplementary material for: Sushi domain-containing protein 4 controls synaptic plasticity and motor learning
Source: eLife. 2021 Mar 4;10:e65712. doi: 10.7554/eLife.65712 (PMC7972451; doi:10.7554/eLife.65712)
Supplement: Figure 2—source data 1. [file elife-65712-fig2-data1.xlsx]

## Sheet: Figure 2A
Figure 2A
	Genotype	Mice	Lobulle	integr int	average int	No. Of clusters/µm^2	area (µm^2)		MEAN/ANIMAL		integr int	average int	No. Of clusters/µm^2	area (µm^2)
	WT	n1 5650	II	63915.9	1234.06	0.516434	0.149876		WT	n1 5650	62074.1	1216.31	0.469459	0.147163
		n2 5609	II	32630.4	948.35	0.326789	0.102084			n2 5609	41410.1	1077.2	0.397033	0.11313
		n3 5608	II	36231.8	848.775	0.39078	0.123608			n3 5608	41165.8	954.853	0.397978	0.125476
		n4 2921	II	591178	11835.6	0.876527	0.143655			n4 2921	551374	10978.3	0.902705	0.145084
		n5 851	II	528109	12349.6	0.910122	0.125038			n5 851	541107	11729.9	0.914194	0.134647
	KO	n1 5662	II	38757.5	934.89	0.43121	0.121902		KO	n1 5662	43825.9	978.005	0.463569	0.130699
		n2 5660	II	39889.2	862.655	0.420448	0.135418			n2 5660	52568.8	1024.9	0.457315	0.146635
		n3 5656	II	30966.9	780.895	0.373473	0.11672			n3 5656	31961.9	800.195	0.377836	0.116501
		n4 846	II	449537	10063.7	0.867656	0.128027			n4 846	681329	14883.6	0.888525	0.132121
		n5 850	II	706657	11934.8	0.858057	0.170036			n5 850	820182	13951.9	0.867946	0.169492
		n6 2919	II	794509	14964.7	0.88918	0.153012			n6 2919	857991	15332.9	0.879436	0.161678
		n7 2920	II	739760	17723.2	0.903432	0.12252			n7 2920	860998	17419.7	0.903796	0.145263
	WT	n1 5650	VI	60232.3	1198.56	0.422484	0.144451
		n2 5609	VI	50189.7	1206.05	0.467277	0.124177			MEAN WT	247426	5191.31	0.616274	0.1331
		n3 5608	VI	46099.8	1060.93	0.405177	0.127345
		n4 2921	VI	511570	10120.9	0.928883	0.146514		NORM TO WT		integr int	average int	No. Of clusters/µm^2	area (µm^2)
		n5 851	VI	554106	11110.2	0.918266	0.144256		WT	n1 5650	0.250879	0.234297	0.76177	1.10566
	KO	n1 5662	VI	48894.3	1021.12	0.495928	0.139496			n2 5609	0.167363	0.2075	0.644248	0.849963
		n2 5660	VI	65248.4	1187.15	0.494183	0.157853			n3 5608	0.166376	0.183933	0.645782	0.942721
		n3 5656	VI	32956.8	819.495	0.382199	0.116282			n4 2921	2.22844	2.11474	1.46478	1.09004
		n4 846	VI	913121	19703.5	0.909395	0.136214			n5 851	2.18694	2.25953	1.48342	1.01162
		n5 850	VI	933707	15969.1	0.877836	0.168948			Shapiro-Wilk normality test	*	*	*	ns
		n6 2919	VI	921473	15701.1	0.869692	0.170345		KO	n1 5662	0.177127	0.188393	0.752212	0.981961
		n7 2920	VI	982237	17116.2	0.904159	0.168006			n2 5660	0.212462	0.197427	0.742065	1.10169
										n3 5656	0.129177	0.154141	0.613097	0.875288
										n4 846	2.75367	2.86702	1.44177	0.99264
										n5 850	3.31486	2.68756	1.40838	1.27342
										n6 2919	3.46766	2.95358	1.42702	1.21471
										n7 2920	3.47982	3.35555	1.46655	1.09138
	STATS									Shapiro-Wilk normality test	*	*	*	ns
	Density	WT	KO
	n=	5	7
	Mean	1	1.122
	s.e.m.	0.1947	0.1493
	Mann Whitney test		P value	>0.9999
	Area	WT	KO
	n=	5	7
	Mean	0.1331	0.1432
	s.e.m.	0.006327	0.00697
	Unpaired t test		P value	0.3304

## Sheet: Figure 2C
Figure 2C
	PF Input/ouput curve								PF-PPR
		WT 21 cells /8 animals			KO 16 cells/ 6 animals					WT 18/8	KO 16/6
		WT 21/8			KO 16/6				N1	1.12121	1.18182		Table Analyzed	PPF 1mo
		Mean	s.e.m.	N	Mean	s.e.m.	N		N2	1.07547	1.05051
	2	3.66148	0.356808	21	3.66363	0.329127	16		N3	1.07266	1.02222		Column B	KO 16/6
	5	6.54652	0.830916	21	7.81409	1.61343	16		N4	1.57143	1.4		vs.	vs.
	10	17.4583	3.06895	21	17.4144	4.08999	16		N5	1.03425	1.04012		Column A	WT 18/8
	15	32.2311	5.48796	21	27.7168	5.69758	16		N6	1.10547	1.3617
	20	56.3325	9.34574	21	47.6754	10.1701	16		N7	1.0963	1.1028		Mann Whitney test
	30	96.6308	14.2792	21	82.4184	12.055	16		N8	1.22018	1.24771		P value	0.9052
	40	124.861	18.2409	21	116.024	16.966	16		N9	1.17308	1.18003		Exact or approximate P value?	Exact
	50	149.515	22.0693	21	138.017	19.2241	16		N10	1.00824	1.20175		P value summary	ns
	60	168.646	24.867	21	156.878	23.446	16		N11	1.24838	1.02778		Significantly different (P < 0.05)?	No
	70	175.697	26.0533	21	172.044	25.4951	16		N12	1.75566	1.22488		One- or two-tailed P value?	Two-tailed
	80	170.111	25.1215	21	170.822	25.3594	16		N13	1.39286	1.0989		Sum of ranks in column A,B	319 , 276
	90	170.885	24.9447	21	166.996	25.3631	16		N14	1.38132	1.21454		Mann-Whitney U	140
	100	168.253	25.0914	21	164.318	23.0753	16		N15	1.32588	1.0967
									N16	1.15676	1.32836		Difference between medians
									N17	1.0991			Median of column A	1.139, n=18
		Table Analyzed	AMPLITUDE 1mo positive values						N18	1.02607			Median of column B	1.181, n=16
													Difference: Actual	0.04194
		Column A	WT 21/8										Difference: Hodges-Lehmann	-0.003257
		vs.	vs.
		Column B	KO 15/6
		Kolmogorov-Smirnov test
		P value	0.8793										Mean	s.e.m.
		Exact or approximate P value?	Approximate								WT 18 cells/ 8 animals		1.215	0.04771
		P value summary	ns								KO 16 cells/ 6 animals		1.174	0.02993
		Significantly different (P < 0.05)?	No
		Kolmogorov-Smirnov D	0.2308								Mann Whitney test			P value =	0.9052

## Sheet: Figure 2D
Figure 2D
	Time (min)	WT																	KO
		N1	N2	N3	N4	N5	N6	N7	N8	N9	N10	N11	N12	N13	N14	N15	N16		N1	N2	N3	N4	N5	N6	N7	N8	N9	N10	N11	N12	N13	N14		Table Analyzed	EPSC (%) LTD							LTD WT	LTD KO		Table Analyzed	LTD A1 NORM last 10 min
	1	116.922	82.6277	149.835	82.5656	67.9127	98.8855	101.78	89.6316	101.08	95.9589	106.592	76.8432	88.1851	104.155	81.4326	81.9104		130.097	106.434	102.409	109.345	89.192	85.9647	99.6284	123.948	85.6425	143.457	107.586	89.0736	87.9916	80.6342									Number of values	16	14
	2	100.828	87.1881	118.539	87.9377	88.9393	85.5485	116.374	90.988	99.2441	104.954	98.5569	99.0952	108.103	89.8516	94.6326	89.4031		95.9467	96.1598	94.8598	102.789	89.3061	96.526	114.346	106.596	86.208	87.6901	97.1932	94.9497	92.8934	92.4244		Two-way RM ANOVA	Matching: Stacked										Column B	KO 14/10
	3	93.8525	94.6561	90.5829	100.866	92.8102	95.366	101.284	101.839	109.935	106.714	100.853	92.5581	115.814	74.1459	95.7973	75.0293		87.9678	88.0022	116.326	98.4077	93.0153	97.0889	104.563	100.293	97.937	82.7788	105.924	94.0815	98.5426	94.5928		Assume sphericity?	Yes						Minimum	11.81	34.54		vs.	vs.
	4	84.9051	99.8796	113.921	83.0677	104.034	88.1418	102.465	101.921	104.32	100.807	96.2611	99.0519	97.7294	94.9768	90.6532	114.277		107.556	85.1932	125.189	96.9876	94.4419	94.0867	98.1479	89.0586	103.152	89.7497	99.4932	96.8978	95.9708	105.773		Alpha	0.05						Maximum	117.2	158.6		Column A	WT 16/11
	5	96.6201	106.96	98.0072	105.435	102.613	99.5647	97.3974	101.432	101.404	96.8818	95.1132	88.0125	107.575	86.4176	86.965	105.153		106	111.359	95.3194	89.8269	102.374	99.3942	94.287	97.5121	93.9575	99.3346	101.836	99.7141	98.8943	104.418									Range	105.4	124
	6	96.9803	100.155	78.0434	104.456	105.133	95.119	95.454	98.3669	103.888	98.2231	96.753	109.226	100.04	107.847	96.4768	103.522		105.88	100.623	94.5973	101.792	108.879	98.1343	86.1008	93.2112	96.0729	105.196	102.73	100.127	97.8612	98.6584		Source of Variation	% of total variation	P value	P value summary	Significant?							Unpaired t test with Welch's correction
	7	107.387	100.033	86.5333	107.368	105.889	109.753	95.6446	100.781	100.972	97.054	97.081	108.879	97.2773	111.58	103.271	110.097		88.1273	101.816	94.5973	93.0598	99.5207	111.644	111.008	99.4772	109.456	104.404	88.2065	103.43	117.359	109.229		Time x Genotype	2.503	0.0005	***	Yes			Mean	66.41	91.8		P value	0.0453
	8	95.2173	109.368	98.2558	104.205	107.561	99.3177	100.217	100.157	98.9201	93.99	101.837	117.148	96.9257	113.848	125.109	101.738		93.2738	94.2743	91.9057	98.0754	102.146	112.743	96.0869	92.9888	110.713	99.8891	107.841	106.575	104.566	95.1348		Time	6.998	<0.0001	****	Yes			Std. Deviation	35.86	29.83		P value summary	*
	9	105.018	112.265	93.6024	108.472	112.256	109.413	93.7393	105.149	94.4924	108.449	105.936	116.802	92.4298	110.033	118.994	96.7939		97.343	104.471	106.151	110.433	110.306	102.584	117.801	84.2015	104.618	101.394	93.4026	103.197	107.731	106.112		Genotype	5.615	0.0829	ns	No			Std. Error of Mean	8.964	7.973		Significantly different (P < 0.05)?	Yes
	10	102.269	106.868	72.6795	115.627	112.852	118.891	95.6446	109.734	85.7451	96.9679	101.017	92.385	95.921	107.145	106.668	122.076		87.8082	111.667	78.645	99.2839	110.819	101.833	78.0307	112.714	112.242	86.1058	95.7877	111.953	98.1909	113.023		Subject	48.62	<0.0001	****	Yes							One- or two-tailed P value?	Two-tailed
																																													Welch-corrected t, df	t=2.095, df=27.98
																																		ANOVA table	SS	DF	MS	F (DFn, DFd)	P value
	21	92.9236	72.5275	23.0542	90.2975	90.309	6.88463	74.6866	124.41	66.7603	65.0719	81.8301	128.534	80.8007	131.225	153.256	49.136		65.547	119.209	87.1135	126.205	115.984	83.9543	78.4051	79.1591	97.916	78.7389	153.371	65.675	130.789	116.411		Time x Genotype	29940	39	767.7	F (39, 1092) = 1.960	P=0.0005			WT	KO		How big is the difference?
	22	98.402	78.4856	21.2426	84.4735	96.7658	39.9185	92.5961	126.255	64.8164	75.5808	76.7465	135.677	93.1331	116.179	121.421	47.505		71.0524	130.753	120.725	126.356	123.556	88.6721	61.0601	108.784	145.774	98.7009	103.88	67.2313	131.141	107.196		Time	83699	39	2146	F (39, 1092) = 5.479	P<0.0001		Theoretical median	100	100		Mean of column A	66.97
	23	85.7961	75.0882	28.7379	87.5361	96.452	45.7535	88.7856	131.219	63.0238	79.9862	79.2063	142.171	96.4987	108.228	149.471	37.1579		58.2462	127.944	103.525	121.099	126.176	83.4718	82.8263	93.2483	130.569	122.228	73.8958	70.1959	144.594	107.128		Genotype	67156	1	67156	F (1, 28) = 3.234	P=0.0829		Actual median	67.99	89.3		Mean of column B	91.8
	24	85.3032	71.191	37.3699	87.3604	94.9403	45.4756	79.6403	127.475	68.9525	76.8729	73.7947	130.785	95.3936	120.242	105.891	32.2137		56.4111	141.835	0.393882	133.426	124.047	86.3936	53.6025	100.145	160.519	112.722	71.7663	72.4193	116.545	89.9173		Subject	581482	28	20767	F (28, 1092) = 53.02	P<0.0001		Number of values	16	14		Difference between means (B - A) ± SEM	24.83 ± 11.85
	25	89.3598	62.1927	39.5013	76.365	92.0085	48.2233	81.5456	124.03	69.0497	72.2091	77.0745	137.106	100.718	110.755	104.144	44.2938		51.2248	158.111	124.335	124.906	127.762	92.0763	70.2798	81.9399	139.868	110.266	56.8593	67.4749	126.547	77.5173		Residual	427722	1092	391.7								95% confidence interval	0.5528 to 49.10
	26	84.9999	59.0912	36.3753	77.57	100.529	48.1924	81.1645	132.006	64.3737	75.6424	76.4185	124.421	108.278	124.924	137.047	31.704		46.1581	160.228	92.234	140.949	131.129	81.7295	64.0502	77.8614	140.748	104.404	65.122	70.6617	133.801	83.6834									Wilcoxon Signed Rank Test				R squared (eta squared)	0.1356
	27	101.037	56.9589	28.2406	81.0845	95.6275	42.2957	80.7834	131.952	64.1361	75.5562	69.203	122.343	111.594	126.636	118.218	35.221		52.4216	165.461	94.6629	116.566	126.039	91.8619	82.8263	105.15	206.807	106.939	68.1034	75.225	115.029	93.9152		Difference between column means							Sum of signed ranks (W)	-102	-37
	28	90.8953	52.1537	37.512	63.2107	94.4364	49.026	69.3518	129.673	61.6739	73.7842	75.2706	136.24	105.867	140.454	96.865	42.8666		37.1818	170.194	-16.0179	126.537	123.185	92.8001	75.5428	88.5395	98.4396	95.057	61.2888	73.9968	122.766	97.7775		Mean of WT	81.11						Sum of positive ranks	17	34		F test to compare variances
	29	90.2697	55.5306	32.7164	55.9307	97.9409	48.6246	62.1118	124.79	64.3197	85.413	76.5825	133.945	116.215	97.5549	87.9356	48.3715		34.4291	191.781	61.9051	124.06	122.033	87.0101	85.6683	95.51	119.531	107.89	48.8948	70.5347	110.61	91.6113		Mean of KO	96.11						Sum of negative ranks	-119	-71		F, DFn, Dfd	1.382, 15, 13
	30	99.0844	54.2247	20.1414	30.1996	97.3453	43.7467	64.0171	126.933	60.5724	79.3832	66.7432	108.966	110.564	117.355	95.7973	33.5389		42.2485	183.2	77.0039	114.089	126.347	94.7569	78.6635	99.9963	96.6174	109.316	68.1034	71.4558	113.93	84.1577		Difference between means	-15						P value (two tailed)	0.0063	0.2676		P value	0.5646
	31	83.2559	52.2251	26.9973	36.601	114.73	61.5294	51.709	122.131	71.5767	83.7148	67.7271	136.066	105.742	121.789	90.4591	38.2282		33.9903	209.289	60.4608	107.502	125.194	97.3302	49.2917	94.8055	124.558	102.107	51.7484	66.2573	126.085	92.0856		SE of difference	8.339						Exact or estimate?	Exact	Exact		P value summary	ns
	32	77.5311	52.6026	38.2224	38.9105	89.9471	52.669	48.089	124.41	79.2873	87.7018	73.4667	97.0172	106.897	121.273	115.306	32.1627		34.8281	184.431	74.8375	106.354	130.758	93.5774	81.3951	106.67	108.367	105.434	71.894	59.8624	116.853	115.531		95% CI of difference	-32.08 to 2.086						P value summary	**	ns		Significantly different (P < 0.05)?	No
	33	78.2136	53.8881	28.2761	36.0989	107.607	39.3319	53.0046	123.596	69.7948	99.0475	50.6724	107.84	113.628	151.076	107.93	27.3714		42.2485	188.856	81.074	124.15	125.479	92.3176	93.2507	92.0248	84.0088	106.068	40.3339	61.3235	127.734	104.825									Significant (alpha=0.05)?	Yes	No
	34	88.848	57.3874	25.6616	42.5003	92.3292	52.7307	46.5648	117.465	68.0994	98.2231	59.8557	127.018	113.252	111.064	93.662	30.5826		35.1472	157.958	67.1568	102.033	125.542	98.0539	87.3607	102.629	64.2371	100.998	40.9728	59.8094	121.667	102.995		Data summary											Data analyzed
	35	76.735	50.96	24.9014	36.6763	100.483	47.081	47.1745	123.108	71.4903	88.957	61.0036	115.849	118.526	126.326	121.809	32.9782		22.6203	161.382	89.6737	105.327	119.87	90.9505	81.6738	77.5648	82.8359	107.731	61.1184	56.9931	117.776	110.991		Number of columns (Genotype)	2						How big is the discrepancy?				Sample size, column A	16
	36	77.2089	52.3475	23.7647	40.5673	88.2063	45.63	41.0014	113.911	72.5702	97.0787	56.248	119.702	121.54	133.133	117.442	27.7282		27.8465	136.755	77.8573	104.481	121.085	97.7055	87.7293	100.404	80.1759	109.474	58.3074	56.1779	120.722	128.134		Number of rows (Time)	40						Discrepancy	-32.02	-10.7		Sample size, column B	14
	37	79.2751	50.7764	15.8076	33.3124	93.337	47.3588	36.4288	118.442	66.1231	104.253	49.0325	104.593	123.349	134.886	100.456	25.1797		26.3305	94.3897	71.2269	105.689	120.115	87.7339	93.1549	92.7663	68.9496	117.871	69.296	54.9179	116.26	119.19		Number of subjects (Subject)	30
	38	77.607	51.9088	20.7097	39.4377	90.4052	49.736	39.4391	119.174	68.1965	88.8831	55.1492	87.7094	134.375	122.717	98.9032	27.8302		34.4291	109.781	92.8248	105.991	118.226	94.6228	82.2399	101.072	85.3493	114.861	77.3883	55.2885	111.094	118.783		Number of missing values	0
	39	76.0525	51.6946	26.1447	34.6931	94.4135	53.2555	34.2949	113.559	62.0086	111.624	50.9511	97.5367	126.739	116.839	80.0738	28.136		43.565	112.206	69.3232	100.855	117.376	82.212	88.3041	86.2408	86.6059	102.662	96.5118	55.1085	110.083	127.253
	40	88.3362	50.001	15.63	32.6848	78.4031	49.6743	42.1065	115.919	55.0756	98.0016	57.9698	107.104	121.842	86.9332	107.93	25.9442		36.5036	100.893	84.225	107.804	110.506	94.8105	102.952	101.368	85.4959	102.978	88.7176	58.9836	123.645	117.563
	41	84.5829	48.7155	15.9852	39.8644	90.1532	14.2015	51.6328	119.771	58.2937	102.025	53.7225	105.286	116.492	125.811	119.771	23.2428		38.8574	122.287	76.8069	87.7542	115.83	98.7509	86.664	82.6814	89.601	108.048	81.9882	52.2816	118.304	131.319
	42	82.0427	48.032	2.6642	35.8479	95.3526	23.1237	36.4669	115.024	52.203	93.1163	54.3785	100.74	115.914	114.364	76.8708	23.2428		39.9745	125.981	82.5839	98.7461	117.81	93.3094	88.0341	91.6911	85.3702	110.821	70.7441	51.8264	108.61	161.878
	43	83.7298	51.3987	10.4082	36.7893	93.0163	23.1855	35.8953	123.026	50.6479	85.7821	44.9656	84.679	106.571	136.639	82.112	21.153		38.259	112.129	70.7674	102.565	108.309	83.5254	94.9779	79.2333	89.4753	114.306	95.2766	50.6829	106.434	163.166
	44	87.7865	43.2472	12.2553	34.1634	93.4744	23.3707	34.8664	118.822	51.2959	86.0159	51.9843	91.4325	121.138	144.579	98.1268	28.034		43.0065	111.975	81.2709	87.9056	108.782	92.8001	84.5042	79.4928	96.6384	117.475	82.2863	52.9381	121.183	180.716
	45	77.6638	49.7052	12.1488	33.6865	75.8148	22.815	39.8582	118.686	58.3477	80.0724	56.084	91.649	104.31	92.8113	80.1708	18.9102		24.9741	107.704	92.3653	97.6493	102.619	89.9855	84.1442	73.7088	84.9513	112.167	84.6288	53.2663	119.271	174.82
	46	73.3608	49.0624	24.4752	33.5383	84.9997	19.3572	27.3597	117.709	51.0259	90.4583	51.6563	87.6661	113.829	123.542	80.462	19.369		33.3918	108.319	66.8942	90.3798	102.539	93.4434	59.539	73.6346	87.9045	100.998	76.1532	51.8687	117.161	174.143
	47	83.0853	57.7588	9.91084	24.1747	86.8549	4.13695	33.266	121.507	49.0281	84.2932	61.1676	90.7832	104.461	127.77	100.747	40.2161		34.0302	111.936	64.9248	99.8459	92.3705	87.6803	93.1172	80.2343	89.4125	110.187	46.4671	49.7406	108.764	176.379
	48	75.9767	60.5706	7.28216	23.999	88.8477	3.92084	37.1909	117.465	45.8531	73.9196	53.2962	90.9996	110.439	101.886	73.1826	22.5292		35.6259	113.437	90.4615	97.7128	91.1949	81.9439	90.7426	76.7491	84.0507	117.316	51.0243	48.4172	119.139	156.39
	49	89.6063	60.5297	7.14007	27.2123	83.6483	2.87117	31.818	111.307	47.1382	75.7039	45.7527	75.2414	122.771	99.6174	76.3855	21.2039		23.4581	125.519	90.3302	101.036	95.6631	91.9423	98.0986	76.23	79.003	112.088	67.5071	48.6818	109.885	164.385
	50	86.4975	63.9474	11.9712	26.66	83.946	3.33426	34.4473	110.33	56.6955	79.8386	42.8337	80.4797	101.07	118.902	97.9326	20.5413		31.836	117.246	81.4679	98.8368	89.4202	81.9707	91.718	68.3327	85.0979	114.227	66.6979	47.0302	112.721	143.651

## Sheet: Figure 2E
Figure 2E
																																LTP WT	LTP KO
Time (min)	WT														KO									Table Analyzed	EPSC (%) LTP						Number of values	13	8
	N1	N2	N3	N4	N5	N6	N7	N8	N9	N10	N11	N12	N13		N1	N2	N3	N4	N5	N6	N7	N8
1	106.259	114.312	119.094	132.535	73.9403	91.1707	122.987	106.111	101.63	92.6165	113.796	95.0849	113.818		96.0576	88.671	116.198	111.921	104.311	113.908	109.775	106.812		Two-way RM ANOVA	Matching: Stacked						Minimum	70.94	83.71
2	87.0214	87.9649	109.387	105.387	97.5131	82.5921	96.5877	70.869	98.0039	92.5465	68.3987	100.085	82.1278		97.3235	110.403	112.35	117.514	70.5186	90.9806	118.585	100.414		Assume sphericity?	Yes						Maximum	152.5	177.8
3	104.132	75.7352	112.454	102.664	110.486	74.2882	117.402	125.828	96.4672	89.7461	104.26	90.1387	94.8929		99.4102	95.0936	97.0018	99.3138	99.5362	75.8795	99.5061	91.3935		Alpha	0.05						Range	81.53	94.12
4	116.462	93.7923	95.4864	92.778	93.2223	104.333	84.076	106.337	103.338	114.702	95.8678	97.766	88.6628		112.947	94.2706	102.773	83.5882	100.297	87.2941	88.5184	109.116
5	112.076	100.049	109.876	98.2243	109.249	107.206	90.7323	99.8945	100.391	104.618	127.279	95.5674	88.7681		102.288	98.5741	90.2272	99.3785	109.353	109.876	102.002	116.626		Source of Variation	% of total variation	P value	P value summary	Significant?			Mean	99.86	122.6
6	101.812	116.851	89.5915	100.588	63.7254	106.564	92.2202	100.537	93.9927	85.0908	91.2024	104.545	86.0408		103.353	101.052	106.762	88.8245	114.879	102.466	106.032	107.964		Time x Genotype	2.073	0.3694	ns	No			Std. Deviation	27.26	28.7
7	112.471	86.7696	87.3486	102.119	120.671	103.899	103.129	93.054	113.324	111.37	111.634	110.513	84.5251		107.988	103.978	93.4078	90.6873	101.325	115.156	102.963	93.9082		Time	20.1	<0.0001	****	Yes			Std. Error of Mean	7.868	9.567
8	99.7193	108.667	94.4137	101.747	100.908	106.104	96.8653	97.3677	93.9263	105.03	83.7251	93.2374	108.153		101.805	102.769	104.405	97.1684	105.031	106.022	96.3848	90.9223		Genotype	4.745	0.1351	ns	No
9	93.5605	101.021	93.078	84.9297	120.364	117.866	95.4738	93.6556	95.7352	108.601	105.737	108.42	118.871		89.0801	100.111	79.1109	107.96	104.867	98.1722	81.8738	100.893		Subject	37.02	<0.0001	****	Yes
10	66.4863	114.838	89.271	79.0275	109.921	105.977	100.526	106.345	103.193	95.6788	98.1008	104.644	134.14		89.7473	105.077	97.7647	103.644	89.8822	100.245	94.3607	81.9511
																								ANOVA table	SS	DF	MS	F (DFn, DFd)	P value			WT (n=13)	KO (n=8)
																								Time x Genotype	29474	40	736.9	F (40, 760) = 1.062	P=0.3694		Theoretical median	100	100		Table Analyzed	LTP mean last 10'
16	114.253	109.143	93.7643	122.98	117.187	107.41	92.0589	123.255	75.9185	117.214	82.9104	109.245	101.679		127.696	94.0882	160.391	144.616	131.795	120.088	121.66	133.886		Time	285811	40	7145	F (40, 760) = 10.30	P<0.0001		Actual median	84.76	124.2
17	156.997	143.653	131.287	117.271	101.968	144.195	107.974	101.228	96.2645	148.866	100.219	113.355	102.733		147.659	106.867	224.333	146.363	111.537	138.519	138.834	161.021		Genotype	67456	1	67456	F (1, 19) = 2.435	P=0.1351		Number of values	13	8		Column B	KO (n=8)
18	132.684	169.262	145.53	140.714	141.91	131.838	109.295	166.162	108.999	189.064	96.2652	134.278	114.371		162.487	141.596	250.601	175.282	118.943	141.781	129.722	172.834		Subject	526258	19	27698	F (19, 760) = 39.92	P<0.0001						vs.	vs.
19	156.779	175.006	114.338	133.226	128.572	160.686	117.385	159.586	104.082	181.749	121.03	137.22	128.03		181.887	140.477	292.023	200.434	140.429	160.239	126.389	158.51		Residual	527273	760	693.8				Wilcoxon Signed Rank Test				Column A	WT (n=13)
20	100.231	213.034	150.24	189.66	139.281	172.648	112.066	184.863	108.034	167.37	105.833	166.85	125.913		187.428	115.875	262.842	178.659	136.285	155.374	102.931	165.22									Sum of signed ranks (W)	-17	32
21	113.837	174.864	129.462	133.595	145.635	191.346	101.035	194.785	110.895	139.558	122.028	145.805	122.361		204.927	134.035	195.864	197.464	128.145	161.686	103.316	158.532		Difference between column means							Sum of positive ranks	37	34		Mann Whitney test
22	114.889	160.761	145.343	137.44	124.4	161.301	98.1961	188.021	120.974	176.945	100.589	143.989	116.724		195.501	118.818	260.308	229.248	174.111	153.042	102.584	173.692		Mean of WT	119.4						Sum of negative ranks	-54	-2		P value	0.0199
23	102.61	217.07	98.8418	139.492	119.673	180.3	95.2997	186.829	110.282	180.199	114.017	157.069	96.5976		216.742	128.154	157.422	172.776	158.468	156.438	116.753	171.659		Mean of KO	137.6						P value (two tailed)	0.5879	0.0234		Exact or approximate P value?	Exact
24	117.109	174.989	101.379	107.767	118.847	161.276	123.895	217.345	117.156	162.738	110.415	142.69	102.545		214.064	157.838	188.711	194.119	151.626	141.548	102.811	133.366		Difference between means	-18.23						Exact or estimate?	Exact	Exact		P value summary	*
25	98.8877	159.117	95.7177	123.598	99.666	187.406	102.124	231.211	115.126	138.596	112.532	123.588	77.946		189.782	125.645	202.24	173.463	144.287	145.005	77.6231	148.101		SE of difference	11.68						P value summary	ns	*		Significantly different (P < 0.05)?	Yes
26	81.4846	171.056	118.623	135.565	108.847	155.287	246.768	200.583	116.569	157.174	96.1505	149.629	84.6734		197.13	107.39	184.614	185.416	123.072	164.588	83.4942	119.04		95% CI of difference	-42.67 to 6.219						Significant (alpha=0.05)?	No	Yes		One- or two-tailed P value?	Two-tailed
27	87.0356	157.674	105.298	88.7906	112.196	183.616	238.204	166.559	118.613	147.677	95.7926	135.918	94.0076		212.918	118.194	222.117	168.586	116.66	146.179	81.6623	142.929													Sum of ranks in column A,B	111 , 120
28	62.2621	156.508	109.473	95.8283	94.4563	196.75	261.18	178.342	122.328	128.076	96.2675	134.547	93.9469		213.32	103.704	206.61	179.169	140.987	114.376	89.1998	148.933		Data summary							How big is the discrepancy?				Mann-Whitney U	20
29	89.8744	193.51	105.259	84.0256	116.1	191.672	247.865	177.281	135.131	156.309	113.352	108.374	92.7945		235.62	129.504	252.483	172.62	128.398	125.498	75.4169	159.617		Number of columns (Genotype)	2						Discrepancy	-15.24	24.24
30	75.9875	139.005	125.099	93.6627	96.4838	175.261	225.144	168.3	116.823	174.11	106.142	123.73	94.1807		227.009	126.109	263.408	147.837	133.828	139.457	76.3179	152.423		Number of rows (Time)	41										Difference between medians
31	105.241	127.075	110.05	65.5702	109.054	165.976	228.216	163.724	119.474	161.843	86.3543	134.094	114.967		215.577	112.814	214.051	168.831	130.487	138.899	82.4054	153.642		Number of subjects (Subject)	21										Median of column A	84.76, n=13
32	96.5475	167.828	100.619	85.1897	82.971	165.129	230.204	175.637	113.033	167.148	103.275	118.53	79.7347		230.587	130.486	191.19	173.312	180.417	121.646	61.1136	144.87		Number of missing values	0										Median of column B	124.2, n=8
33	79.1745	158.038	108.519	91.8231	72.576	159.184	216.915	162.935	122.468	150.9	95.743	110.387	93.3209		222.967	140.276	179.354	135.673	124.244	106.603	72.1374	181.166													Difference: Actual	39.48
34	57.2014	137.566	89.5272	92.0463	70.732	187.991	218.855	161.9	112.569	139.338	95.0379	131.751	110.577		206.775	129.305	211.464	129.178	140.087	157.145	80.0493	139.653													Difference: Hodges-Lehmann	30.61
35	49.5471	131.921	98.0231	112.653	59.8678	176.34	188.355	184.376	100.32	135.016	108.818	125.93	71.6172		202.774	116.552	176.842	143.702	144.435	133.369	74.7615	133.283
36	68.958	154.445	104.327	90.6379	86.6097	192.498	194.305	154.221	99.6368	152.476	94.7126	122.857	70.8686		213.844	140.344	207.691	126.684	121.111	123.047	63.0883	153.552
37	68.835	143.685	102.491	66.318	65.969	163.242	213.105	145.266	117.709	148.562	94.8916	107.302	85.1979		222.451	140.735	162.257	127.908	154.501	134.398	52.7949	140.558
38	69.7984	152.826	90.3344	96.4779	28.1152	188.388	192.699	132.2	108.928	133.22	85.6778	115.961	80.8042		213.007	118.683	162.111	135.344	153.398	130.592	71.768	141.127
39	69.4817	124.491	99.1355	75.4106	85.483	166.215	215.532	123.483	107.48	134.454	103.276	126.93	87.9246		217.864	134.432	164.029	109.633	120.204	166.92	64.8338	139.136
40	79.8678	163.092	80.0842	79.5637	67.6562	165.061	190.125	133.091	101.648	139.813	52.0947	119.302	100.13		216.618	150.939	147.078	142.567	155.567	121.369	78.1532	124.9
41	59.9822	132.195	85.2087	94.5909	84.9349	149.043	214.239	140.531	101.431	127.939	110.27	114.873	72.5717		219.03	159.323	160.707	138.663	141.053	147.082	69.0988	152.356
42	53.6537	149.15	67.3658	92.4605	95.2421	170.049	221.368	125.741	99.1047	143.993	108.554	98.8633	69.6844		206.947	160.825	130.4	140.435	142.495	124.951	67.4485	157.99
43	74.5709	133.216	96.5312	98.0297	89.4898	178.679	175.352	109.299	96.8624	127.265	82.2358	108.673	64.2144		196.156	167.616	163.277	130.443	123.09	137.991	67.9221	153.486
44	78.5961	132.929	75.0052	87.2519	75.8002	177.196	179.685	146.057	102.474	130.471	57.936	94.8695	76.1279		194.045	150.072	143.392	124.423	111.4	134.205	64.4421	137.375
45	72.481	134.042	77.3941	81.4635	76.3452	204.551	203.124	139.658	97.9835	147	65.544	113.056	80.604		211.653	160.008	165.87	140.576	154.143	146.345	60.2748	130.327
46	80.7599	133.792	97.649	65.2075	87.7553	180.367	195.698	126.474	92.5344	133.344	102.968	109.213	80.604		200.979	150.328	138.43	108.037	150.172	129.197	60.2748	140.486

## Sheet: sup1
Figure Sup 6
B	Rise Time
		WT	KO
	n =	8	6	mice
	N =	21	16	cells
	Mean	10.34	11.32
	s.e.m.	0.7798	1.089
	Unpaired t test		P value	0.457
	Decay Time
		WT	KO
	n =	8	6	mice
	N =	21	16	cells
	Mean	25.39	26.87
	s.e.m.	3.997	4.587
	Mann Whitney test		P value	0.7276
D	Paired-Pulse during LTD
		WT	KO
	n =	11	10	mice
	N =	16	14	cells
	Mean	81.11	96.11
	Two-way RM ANOVA
	Source of Variation		P value	F (DFn, DFd)
	Time x genotype		0.9935	F (39, 1092) = 0.5222
	Time		0.705	F (39, 1092) = 0.8658
	genotype		0.1239	F (1, 28) = 2.516
	Subject		<0.0001	F (28, 1092) = 38.25
F	Paired-Pulse during LTP
		WT	KO
	n =	9	6	mice
	N =	13	8	cells
	Mean	1.631	1.545
	Two-way RM ANOVA
	Source of Variation		P value	F (DFn, DFd)
	Time x genotype		0.9366	F (39, 741) = 0.6745
	Time		<0.0001	F (39, 741) = 5.893
	genotype		0.2567	F (1, 19) = 1.368
	Subject		<0.0001	F (19, 741) = 43.29
G	PF mEPSC amplitude
		WT	KO
	n =	6	5	mice
	N =	8	8	cells
	Mean	20.212	22.0522
	s.e.m.	0.487399	0.557871
	Kolmogorov-Smirnov test		P value	0.1667
	Interevent Interval
		WT	KO
	n =	6	5	mice
	N =	8	8	cells
	Mean	52.62	47.67
	s.e.m.	3.058	1.902
	Unpaired t test		P value	0.1913
	Time to Peak
		WT	KO
	n =	6	5	mice
	N =	8	8	cells
	Mean	3.98	3.972
	s.e.m.	0.1355	0.1143
	Mann Whitney test		P value	0.6454
	Rise time
		WT	KO
	n =	6	5	mice
	N =	8	8	cells
	Mean	5.008	5.413
	s.e.m.	0.4726	0.7295
	Unpaired t test		P value	0.6486
