# Supplementary material for: Sushi domain-containing protein 4 controls synaptic plasticity and motor learning
Source: eLife. 2021 Mar 4;10:e65712. doi: 10.7554/eLife.65712 (PMC7972451; doi:10.7554/eLife.65712)
Supplement: Figure 3—source data 1. [file elife-65712-fig3-data1.xlsx]

## Sheet: Figure 3A
Figure 3A
		WT (26/9)	KO (26/7)		Table Analyzed	Amplitude 1mo		Interstimulus Interval								Table Analyzed	IEI
	N1	-417.5	-1793.7						WT			KO
	N2	-696.4	-703.98		Column B	KO (26/7)			Mean	s.e.m.	N	Mean	s.e.m.	N		Column A	WT
	N3	-129.4	-378.23		vs.	vs.		50	0.751	0.035	12	0.746	0.023	17		vs.	vs.
	N4	-468.8	-513.79		Column A	WT (26/9)		100	0.8	0.028	12	0.809	0.015	17		Column B	KO
	N5	-800.7	-930.1					200	0.819	0.026	12	0.855	0.011	17
	N6	-1507.9	-1224		Mann Whitney test			400	0.875	0.017	12	0.894	0.009	17		Kolmogorov-Smirnov test
	N7	-778.9	-968.2		P value	0.0066		500	0.868	0.025	12	0.905	0.008	17		P value	0.474
	N8	-636.1	-674.26		Exact or approximate P value?	Exact		800	0.887	0.026	12	0.888	0.039	17		Exact or approximate P value?	Exact
	N9	-369.1	-451.35		P value summary	**										P value summary	ns
	N10	-714.9	-1293.3		Significantly different (P < 0.05)?	Yes										Significantly different (P < 0.05)?	No
	N11	-987.6	-1167		One- or two-tailed P value?	Two-tailed										Kolmogorov-Smirnov D	0.5
	N12	-876.5	-1128.5		Sum of ranks in column A,B	836 , 542
	N13	-660.1	-1266.2		Mann-Whitney U	191
	N14	-697.9	-1009.2
	N15	-872.5	-788.27		Difference between medians
	N16	-575.6	-1419.7		Median of column A	-746.6, n=26
	N17	-549.9	-1610.72		Median of column B	-1245, n=26
	N18	-889.6	-1701.37		Difference: Actual	-498.5
	N19	-409.2	-1500.05		Difference: Hodges-Lehmann	-404.9
	N20	-2504	-1810.86
	N21	-2440.1	-1777.05
	N22	-1251.3	-2336.97
	N23	-1432.3	-2730.88
	N24	-569	-1914
	N25	-778.3	-1375.73
	N26	-1585.1	-949.787

## Sheet: Figure 3C
Figure 3C
	WT (10/6)											KO (8/3)
	N1	N2	N3	N4	N5	N6	N7	N8	N9	N10		N1	N2	N3	N4	N5	N6	N7	N8
	-81.34	-17.33	-20.6	-105.14	-25.42	-8.82	-69.82	-25.88	-97.24	-22.54		-118.75	-58.73	-34.98	-42.26	-27.41	-9.19	-126.21	-122.88			Table Analyzed	Peak Amp (pA)			WT (10/6)	KO (8/3)		Table Analyzed	Interevent Interval (ms) mean
	-59.1	-28.55	-9.72	-93.06	-13.62	-6.36	-27.92	-25.38	-78.98	-10.04		-77.83	-45.28	-34.82	-59.91	-23.27	-13.05	-79.01	-251.99							30.12	30.92
	-28.18	-44.11	-12.91	-63.88	-12.63	-5.85	-11.63	-13.96	-49.84	-11.85		-54.63	-40.85	-56.09	-61.21	-17.67	-7.03	-68.5	-156.49			Column A	WT (10/6)			29.53	31.08		Column B	KO (8/3)
	-25.89	-27.31	-27.34	-37.36	-13.72	-7.25	-27.71	-31.44	-38.97	-21.62		-104.7	-86.17	-57.07	-54.22	-43.98	-9.6	-154.21	-123.91			vs.	vs.			39.34	30.53		vs.	vs.
	-19.08	-19.65	-33.27	-93.61	-42.85	-5.98	-10.89	-16.07	-18.48	-14.01		-77.95	-98.85	-45.05	-26.11	-24.73	-10.51	-141.56	-112.66			Column B	KO (8/3)			26.5	38.47		Column A	WT (10/6)
	-14.22	-26.18	-14.09	-40.26	-8.47	-6.75	-18.54	-15.36	-25.66	-13.19		-42.54	-96.95	-31.8	-19.36	-32.94	-5.49	-81.03	-81.21							42.2	51.8
	-18.78	-29.14	-18.63	-36.8	-6.13	-12.08	-32.98	-22.26	-44.77	-29.99		-74.89	-63.87	-49.69	-24.64	-17.12	-9.86	-150.54	-55.21			Kolmogorov-Smirnov test				39.85	49.43		Mann Whitney test
	-11.64	-63.59	-11.3	-17.53	-3.99	-14.1	-30.73	-40.79	-11.81	-24.14		-28.89	-97.46	-28.76	-11.29	-20.35	-8.59	-43.9	-66.33			P value	<0.0001			29.47	28.13		P value	0.6334
	-9.59	-44.85	-8.35	-16.54	-8.57	-8.63	-30.19	-16.56	-28.94	-29.73		-30.46	-142.42	-22.93	-95.42	-24.48	-6.72	-86.57	-90.13			Exact or approximate P value?	Approximate			29.07	27.37		Exact or approximate P value?	Exact
	-7.83	-17.69	-22.37	-38.16	-20.41	-9.2	-17.62	-9.77	-42.35	-29.14		-12.31	-79.52	-24.88	-41.16	-45.68	-6.25	-85.63	-76.64			P value summary	****			29.08			P value summary	ns
	-9.17	-26.57	-25.62	-20.17	-27.38	-8.39	-25.08	-12.51	-35.22	-26.82		-30.03	-46.97	-15.43	-39.04	-18.45	-8.58	-93.26	-62.08			Significantly different (P < 0.05)?	Yes			45.43			Significantly different (P < 0.05)?	No
	-71.26	-33.15	-12.61	-15.72	-8.43	-5.78	-31.96	-14.86	-12.86	-10.37		-22.48	-16.18	-9.37	-54.18	-11.86	-10.57	-61.84	-51.09			Kolmogorov-Smirnov D	0.865						One- or two-tailed P value?	Two-tailed
	-42	-18.92	-25.64	-7.36	-16.32	-4.74	-28.46	-9.23	-13.74	-19.66		-18.08	-43.28	-13.39	-35.51	-16.27	-11.47	-80	-19.37										Sum of ranks in column A,B	89 , 82
	-13.07	-20.59	-14.54	-24.51	-46.73	-9.04	-12.62	-9.46	-9.21	-44.53		-24.4	-67.01	-17.15	-19.35	-32.09	-6.61	-91.61	-40.36										Mann-Whitney U	34
	-28.95	-17.9	-8.97	-28.08	-23.28	-5.36	-62.26	-14.32	-80.29	-16.92		-106.09	-70.46	-14.74	-26.06	-41.71	-6.34	-217.06	-39.42
	-14.38	-18.6	-11.39	-56.54	-19.46	-8.86	-20.79	-16.26	-49.7	-25		-111.62	-141.51	-5.51	-29.84	-14.07	-4.22	-142.16	-11.62										Difference between medians
	-17.99	-26.47	-15.45	-90.3	-6.57	-9.28	-13.05	-6.48	-87.93	-15.63		-118.5	-63.16	-5.28	-13.95	-35.32	-5.99	-98.95	-29.47										Median of column A	29.83, n=10
	-20.13	-14.17	-8.87	-58.19	-24.82	-9.1	-23.06	-16.16	-35.61	-7.73		-120.69	-89.27	-8.42	-17.75	-29.06	-16.13	-144.59	-14.85										Median of column B	31.00, n=8
	-25.44	-31.16	-6.59	-39.05	-9.06	-7.3	-11.71	-21.53	-70.44	-6.82		-88.18	-75.39	-42.8	-25.6	-25.34	-9.56	-216.79	-129.35										Difference: Actual	1.175
	-17.64	-12.69	-11.15	-53.37	-27	-7.12	-14.98	-26.61	-40.71	-8.91		-102.05	-44.81	-46.7	-18.48	-32.95	-13.51	-210.44	-133.51										Difference: Hodges-Lehmann	1.225
	-14.52	-26.89	-30.49	-26.5	-5.57	-4	-24.33	-38.19	-36.24	-6.81		-52.82	-51.49	-20.73	-26.1	-21.25	-8.38	-61.54	-137.17
	-26.65	-16.06	-20.23	-16.24	-35.62	-8.68	-18.86	-27.34	-33.7	-6.93		-56.7	-46.4	-28.27	-66.07	-35.54	-8.83	-32.81	-137.7
	-12.52	-17.54	-26.57	-14.22	-26.06	-25.6	-11.87	-12.1	-46.65	-35.07		-43.15	-93.2	-29.03	-64.46	-19.7	-8.87	-115.18	-89.34
	-68.03	-71.54	-17.85	-26.87	-23.35	-6.9	-11.82	-13.89	-14.17	-17.67		-23.43	-61.31	-27.92	-85.92	-18.28	-5.7	-114.1	-44.24
	-26.42	-14.47	-16.6	-30.5	-8.35	-7.84	-20.12	-13.86	-6.3	-8.34		-39.46	-62.02	-67.56	-45.56	-13.58	-7.14	-107.77	-107.43
	-26.76	-27.9	-16.48	-9.78	-25.01	-17.36	-8.44	-26.38	-12.06	-9.29		-11.26	-120.47	-19.01	-28.91	-18.74	-13.55	-83.82	-51.84
	-37.24	-26.86	-19.65	-11.15	-9.79	-9.37	-31.56	-19.3	-24.83	-11.55		-36.55	-32.62	-13.43	-29.87	-22.52	-16.22	-44.52	-42.38
	-29.8	-23.44	-12.36	-11.49	-11.57	-8.66	-25.72	-8.42	-227.96	-9.14		-12.8	-36.97	-12.86	-52.89	-27.78	-5.71	-97.02	-49.24
	-25.31	-21.64	-8.4	-7.71	-12.45	-4.71	-40.58	-6.04	-84.69	-9.84		-22.69	-77.16	-8.05	-18.44	-20.25	-7.37	-96.35	-56.32
	-10.46	-26.05	-10.45	-44.76	-21.48	-5.44	-36.63	-27.92	-127.23	-38.4		-25.93	-99.64	-7.83	-28.12	-25.03	-4.93	-56.34	-46.66
	-21.16	-11.85	-32.48	-53.57	-73.32	-7.27	-45.3	-35.78	-136.02	-14.18		-37.07	-45.36	-75.28	-30.79	-44.04	-4.94	-116.19	-26.52
	-9.58	-22.21	-50.54	-64.26	-8.55	-8.32	-24.82	-14.68	-54.09	-17.45		-162.03	-41.17	-44.05	-17.76	-11.02	-11.86	-89.92	-190.59
	-28.93	-17.08	-9.79	-58.42	-19.27	-24.08	-23.73	-29.09	-48.59	-20.07		-129.05	-69.91	-54.68	-69.6	-26.9	-6.7	-121.65	-125.84
	-9.47	-21.14	-16.82	-31.55	-6.85	-13.15	-26.14	-10.96	-24.44	-21.44		-107.56	-75.38	-57.83	-71.06	-13.2	-20.73	-157.29	-153.58
	-10.97	-19.48	-13.51	-43.76	-13.99	-6.79	-22.28	-16.38	-99.54	-5.31		-121.11	-67.9	-30.23	-57.54	-20.08	-8.77	-135.32	-170.3
	-10.36	-25.98	-8.97	-51.48	-23.52	-8.25	-38.3	-13.39	-30.94	-5.79		-50.72	-89.27	-22.27	-36.35	-33.91	-8.66	-179.37	-67.72
	-8.03	-16.42	-11.5	-22	-37.49	-8.28	-17.54	-14.58	-46.26	-8.07		-66.59	-102.58	-21.75	-74.67	-10.48	-9.82	-102.87	-91.45
	-45.41	-35.51	-7.69	-8.69	-13.42	-13.25	-18.22	-6.71	-27.31	-13.05		-75.56	-95.8	-21.24	-18.97	-49.65	-12.6	-167.46	-112.67
	-65.18	-31.34	-10.14	-33.18	-7.74	-33.27	-16.58	-10.96	-21.85	-11.63		-22.98	-60.53	-20.69	-26.11	-21.18	-9.31	-55.17	-103.95
	-21	-31.76	-6.01	-15.48	-38.51	-19.82	-7.71	-19.41	-29.57	-14.14		-23.98	-79.52	-9.08	-18.23	-29.12	-11.96	-27.79	-64.75
	-18.64	-22.05	-9.88	-19.04	-11.56	-16.02	-15.91	-21.75	-16.7	-8.56		-18.18	-87.03	-4.61	-62.29	-18.48	-13.66	-103.14	-80.72
	-38.1	-32.98	-9.34	-11.63	-22.76	-22.42	-15.31	-7.28	-9.5	-8.22		-15.32	-103.32	-11.2	-27.92	-23.17	-9.47	-93.2	-41.21
	-46.55	-13.5	-13.6	-126.03	-21.49	-12.31	-35.34	-47.01	-11.13	-31.54		-8.92	-30.33	-78.09	-76.49	-13.6	-5.39	-74.81	-50.96
	-15.46	-21.21	-21.48	-87.08	-24.91	-11.44	-25.24	-18.64	-6.88	-27.02		-76.39	-71.95	-69.77	-32.51	-13.39	-7.46	-69.35	-125.29
	-32.96	-14.31	-8.99	-87.92	-19.17	-13.94	-26.68	-44.65	-63.52	-8.55		-161.63	-98.55	-38.71	-43.07	-20.72	-8.73	-61.88	-85.09
	-10.79	-30.02	-63.58	-55.53	-21.24	-6.53	-17.11	-30	-95.71	-10.51		-152.35	-40.2	-49.86	-51.89	-30.5	-8.35	-120.96	-15.22
	-18.95	-12.62	-23.28	-35.7	-13.45	-5.06	-21.58	-31.72	-59.69	-21.21		-86.16	-26.82	-30.22	-23.04	-26.1	-9.25	-228.63	-30.94
	-9.06	-13.11	-12.04	-49.06	-16.85	-5.62	-26.14	-37.96	-52.84	-9.16		-48.79	-45.68	-29.36	-34.38	-24.04	-9.09	-94.66	-33.91
	-14.16	-19.62	-17.46	-30.55	-7.04	-6.09	-24.65	-21.43	-67.6	-23.14		-32.53	-73.64	-16.77	-19.03	-89.01	-6.35	-163.35	-134.61
	-20.02	-25.14	-18.03	-27.74	-7.93	-27.32	-12.65	-19.13	-32.09	-13.22		-58.07	-79.33	-19.23	-11.32	-36.66	-11.35	-135.08	-272.09
	-10.49	-26.22	-10.9	-39.63	-15.44	-23.7	-11.59	-27.4	-35.66	-12.11		-28.97	-77.03	-9.18	-25.33	-73.36	-11.97	-85.01	-113.04
	-11.6	-40.08	-5.13	-18.09	-33.53	-6.83	-24.99	-13.95	-34.28	-8.11		-34.51	-119.09	-19.68	-50.62	-26.66	-6.28	-141.49	-125.73
	-13.45	-21.49	-37.93	-27.64	-20.03	-10.77	-12.86	-13.67	-10.72	-10.38		-28.36	-34.8	-11.92	-83.72	-28.68	-17.24	-163.36	-150.42
	-22.42	-18.83	-20.18	-21.13	-20.5	-4.03	-21.55	-15.58	-31.42	-6.91		-27.43	-74.29	-9.68	-23.01	-33.94	-13.25	-53.93	-85.33
	-13.82	-32.33	-38.69	-12.54	-19.23	-13.64	-9.5	-17.94	-8.17	-13.78		-50.35	-78.32	-13.73	-25.01	1.1	-5.41	-108.55	-93.69
	-24.93	-33.86	-25.92	-9.96	-13.16	-6.99	-5.51	-34.56	-54.04	-8.3		-24.74	-88.53	-19.97	-31.88	-17.32	-7.6	-70.66	-105.45
	-34.9	-43.32	-19.17	-15.42	-23.02	-7.8	-16.8	-54.38	-18.12	-45.43		-201.34	-61.58	-17.89	-21.6	-62.81	-10.91	-80.74	-139.42
	-32.54	-17.12	-24.65	-15.19	-15.14	-12.76	-35	-24.59	-64.04	-21.14		-72.38	-68.66	-31.42	-28.76	-33.03	-11.62	-88.72	-80.02
	-45.34	-14.08	-11.24	-21.12	-5.24	-17.12	-31.96	-8.94	-55.55	-13.48		-34.18	-105.6	-37.8	-18.27	-39.17	-19.14	-58.55	-28.46
	-15.9	-16.17	-9.24	-121.06	-12.05	-24.19	-23.11	-14.32	-43.82	-25.11		-47.57	-69.4	-47.27	-6.98	-25.91	-7.12	-104.51	-54.44
	-25.45	-18.19	-7.88	-27.6	-41	-14.72	-19.28	-37.3	-33.64	-9.65		-39.6	-40.11	-66.96	-25.34	-30.75	-14.95	-36.82	-27.78
	-23.41	-37.88	-11.19	-36.2	-41.68	-6.75	-8.46	-11.17	-41.51	-25.26		-46.74	-25.17	-9.42	-76.72	-58.77	-8.05	-71.82	-21.72
	-11.21	-44.07	-6.25	-45.98	-31.84	-8.93	-17.95	-13.72	-23.83	-7.62		-41.39	-59.25	-28.04	-62.72	-26.69	-5.39	-111.53	-33.52
	-37.25	-39.51	-17.58	-35.52	-19.03	-13.21	-12.38	-16.78	-28.29	-32.4		-17.05	-82.89	-35.78	-33.07	-20.52	-10	-117.7	-27.67
	-33.88	-18.2	-28.82	-74.36	-14.15	-22.78	-14.75	-32.73	-17.34	-22.94		-14.08	-86.86	-37.21	-36.42	-62.71	-9.54	-138.65	-160.68
	-11.4	-17.26	-26.38	-41.32	-14.48	-9.03	-18.57	-25.25	-5.69	-14.4		-49.02	-35.43	-11.55	-41.52	-34.01	-5.71	-177	-110.4
	-8.25	-28.36	-15.79	-38.25	-29.38	-9.95	-32.14	-20.59	-19.69	-13.68		-8.65	-61.12	-7.3	-27.65	-51.31	-17.44	-137.34	-128.63
	-25.01	-29.69	-6.68	-17.71	-20.31	-8.42	-49.8	-19.66	-8.75	-20.85		-12.13	-69.33	-14.72	-24.23	-38.47	-8.8	-140.51	-99.37
	-90.68	-27.08	-7.72	-29.13	-21.22	-13.53	-28.01	-13.72	-25.6	-18.8		-45.99	-108.01	-15.59	-26.52	-16.12	-10.9	-80.32	-118.59
	-21.91	-22.16	-9.7	-22.33	-8.94	-12.51	-34.55	-11.41	-144.53	-5.44		-64.33	-73.74	-47.57	-10.67	-25.25	-5.34	-99.13	-139.09
	-54.58	-25.61	-15.14	-9.34	-29.52	-5.39	-19.32	-33.64	-78.48	-7.34		-68.61	-34.95	-69.12	-53.75	-21.08	-13.82	-193.49	-62.82
	-14.82	-18.39	-58.4	-14.35	-27.43	-6.59	-11.25	-63.57	-103.8	-13.01		-38.46	-66.55	-30.26	-34.34	-29.76	-8.19	-30.45	-58.29
	-23.2	-26.68	-17.14	-6.58	-10.27	-6.1	-13.35	-29.21	-58.71	-6.63		-130.64	-54.41	-37.55	-37.43	-44.56	-9.39	-47.77	-70.61
	-32.09	-18.67	-29.77	-9.73	-4.82	-29.52	-30.72	-44.71	-50.47	-13		-38.58	-28.44	-16.21	-39.93	-52.14	-13.69	-37.17	-38.52
	-21.08	-44.14	-18.06	-14.34	-22.39	-18.84	-12.49	-31.34	-38.37	-27.26		-71.18	-48.64	-50.72	-26.41	-41.22	-5.88	-69.14	-52.68
	-30.73	-23.92	-10.28	-24.61	-14.81	-34.09	-41.25	-20.63	-43.16	-13.92		-32.39	-36.11	-19.77	-30.2	-26.41	-13.18	-197.08	-55.33
	-6.42	-13.17	-5.17	-60.6	-55.8	-16.91	-15.68	-18.41	-29.03	-10.14		-37.78	-121.06	-23.77	-57.48	-28.44	-8.55	-76.15	-20.76
	-18.77	-8.91	-19.32	-75.37	-14.79	-9.01	-9.14	-7.81	-15.99	-10.02		-42.01	-73.65	-14.8	-11.54	-46.89	-8.53	-111.43	-164.29
	-8.36	-14.54	-10.52	-113.29	-21	-13.58	-27.74	-6.77	-12.87	-20.34		-24.81	-78.05	-12.36	-10.9	-21.87	-11.79	-204.35	-134.11
	-17.55	-23.07	-11.21	-49.85	-28.2	-11.32	-11.47	-9.75	-20.91	-13.25		-8.47	-45.38	-6.66	-69.88	-51.19	-10.57	-164.81	-146.25
	-62.76	-18.51	-5.4	-19.95	-11.18	-3.99	-14.74	-18.63	-31.83	-19.77		-177.07	-60.48	-48.74	-28.96	-36.16	-9.15	-144.65	-75.77
	-18.79	-24.62	-14.05	-26.72	-16.56	-5.98	-16.42	-13.7	-7.11	-18.61		-92.05	-67.54	-26.79	-66.78	-25.55	-6.95	-84.67	-123.78
	-18.5	-26.38	-25.44	-23.24	-10.35	-4.5	-13.64	-14.69	-6.65	-17.7		-43.58	-61.51	-66.7	-61.01	-30.14	-17.32	-44.21	-62.62
	-28.08	-20.01	-28.64	-32.41	-12.28	-11.41	-9.6	-19.16	-97.44	-12.16		-39.17	-74.93	-46.51	-29.55	-26.88	-12.36	-54.38	-32.61
	-39.6	-32.17	-13.59	-53.28	-10.44	-7.67	-37.41	-15.44	-138.82	-15.37		-30.79	-79.29	-37.21	-41	-15.84	-8.58	-81.61	-43.81
	-29.4	-31.92	-20.96	-33.79	-35.87	-7.78	-16.67	-23.3	-48.99	-25.67		-37.53	-48.11	-34.21	-30.94	-31.02	-8.12	-92.35	-48.53
	-35.91	-17.46	-9.22	-20.07	-30.78	-27.53	-39.66	-30.04	-77.58	-22.52		-38.85	-17.65	-18.62	-10.96	-27.71	-12.54	-150.53	-21.63
	-8.89	-34.29	-15	-42.17	-8.82	-24.09	-13.63	-25.03	-109.54	-9.96		-20.21	-28.26	-27.97	-12.81	-29.76	-9.94	-76.23	-27.8
	-11.61	-16.77	-12.09	-16.31	-15.86	-12.87	-13.51	-17.89	-42.58	-7.35		-30.75	-27.59	-8.79	-14.95	-54.83	-5.73	-86.6	-142.61
	-12.91	-10.64	-15.35	-18.32	-10.19	-15.17	-9.91	-26.07	-26.07	-10.94		-23.3	-37.86	-15.7	-21.07	-24.07	-7.31	-102.81	-99.15
	-9.51	-27.28	-5.61	-5.97	-27.43	-14.58	-12.85	-11.83	-35.11	-11.95		-23.5	-78.01	-14.16	-36.16	-40.18	-5.5	-57.84	-203.53
	-17.31	-18.98	-7.46	-7.98	-5.6	-10.19	-8.53	-8.98	-56.63	-39.22		-105.52	-41.2	-14.96	-12.52	-28.89	-7.46	-42.78	-68.51
	-23.19	-20.76	-30.07	-11.66	-5.86	-8.64	-8.29	-23.73	-17.26	-14		-58.09	-66.09	-47.22	-35.75	-34.99	-16.59	-56.28	-80.74
	-42.55	-37.63	-44.8	-154.5	-11.82	-10.72	-14.22	-19.14	-27.8	-17.34		-115.52	-18.67	-57.31	-34.99	-13	-9.69	-176.43	-77.77
	-22.66	-14.11	-16.65	-81.03	-13.11	-9.01	-16.05	-30.11	-8.21	-7.88		-59.41	-81.48	-22.91	-58.5	-26.78	-10.48	-42.24	-16.76
	-27.4	-33.38	-16.89	-72.4	-36.08	-40.39	-32.88	-11.26	-28.21	-7.54		-76.07	-61.43	-32.9	-46.3	-26.73	-3.62	-103.39	-41.8
	-45.45	-15.5	-15.12	-44.22	-35.77	-20.67	-17.17	-19.49	-11.42	-21.94		-65.59	-44.97	-17.67	-41.84	-42.03	-11.28	-41.59	-20.11
	-33.31	-28.63	-6.32	-60.25	-50.34	-23.73	-15	-29.03	-9	-14.91		-74.59	-22.34	-49.42	-17.91	-29.93	-10.28	-171.3	-62.6
	-26.35	-31.61	-14.16	-13.79	-19.44	-8.23	-12.32	-25.04	-8.42	-30.93		-48.17	-40.55	-19.95	-21.86	-18.89	-8.4	-87.75	-51.39
	-12.33	-13.09	-16.02	-13.73	-44.66	-9.87	-14.34	-44.49	-5.3	-11.77		-50.84	-45.27	-30.73	-112.95	-23.85	-5.56	-66.95	-63.24
	-21.14	-30.79	-6.79	-42.38	-27.54	-11.37	-8.04	-26.17	-12.41	-9.73		-51.54	-61.97	-27.26	-32.58	-19.18	-6.45	-43.7	-36.24
	-36.01	-36.93	-21.7	-23.74	-14.45	-9.22	-17.91	-12.37	-151.43	-29.67		-60.98	-97.31	-22.21	-38.77	-22.68	-10.54	-140.2	-63.72
	-45.64	-18.6	-22.65	-18.42	-20.15	-7.4	-25.38	-24.46	-39.34	-25.78		-26.96	-87.07	-23.32	-26.38	-25.02	-6.86	-89.31	-36.32
	-8	-19.62	-9.49	-15.89	-38.17	-8.5	-28.43	-21.35	-56.49	-26.46		-17.49	-58.1	-17.99	-38.83	-21.33	-6.92	-65.62	-139.31
	-12.1	-22.52	-9.51	-10.13	-11.26	-8.9	-9.03	-17.63	-50.16	-14.57		-35.54	-31.41	-16.9	-18.67	-13.22	-9.99	-140.44	-141.53
	-19.93	-29.54	-20.04	-10.13	-13.8	-14.87	-11	-10.96	-54.25	-15.83		-17.35	-23.81	-13.15	-26.74	-33.1	-5.53	-124.33	-277.84
	-4.54	-21.28	-19.22	-56.71	-26.78	-6.37	-14.86	-15.57	-35.84	-14.27		-26.22	-78.96	-14.01	-13.23	-24.57	-4.33	-112.65	-91.36
	-4.55	-25.52	-6.41	-108.15	-86.79	-33.73	-8.18	-7.95	-34.92	-10.57		-19.22	-24.81	-12.61	-19.4	-36.78	-10.77	-28.37	-121.23
	-29.54	-22.96	-12.82	-80.02	-26.72	-17.45	-28.52	-18.22	-40.3	-17.04		-19.6	-80.31	-7.18	-19.81	-17.93	-8.28	-129.88	-155.64
	-65.39	-15.4	-12.62	-63.9	-7.72	-12.8	-41.86	-21.44	-21.5	-7.81		-119.24	-56.25	-7.52	-79.74	-18.32	-10.23	-52.85	-64.72
	-30.61	-15.34	-5.04	-74.91	-27.31	-16.34	-13.34	-23.1	-34.94	-11.3		-104.15	-56.1	-19.33	-15.07	-44.57	-10.87	-81.59	-72.53
	-56.07	-14.94	-12.53	-45.19	-32.2	-14.34	-17.26	-35.4	-13.28	-6.24		-59.12	-36.8	-33.65	-71.17	-21.54	-6.36	-60.04	-53.75
	-26.06	-21.53	-5.33	-36.94	-11.14	-5.34	-11.23	-27.77	-9.66	-23.49		-73.72	-41.89	-48.59	-58.13	-34.37	-4.48	-101.56	-32.16
	-19.75	-22.22	-7.79	-34.47	-25.55	-14.25	-23.21	-26.22	-13.7	-18.74		-141.58	-33.81	-73.89	-43.08	-41.87	-4.9	-143.57	-64.45
	-21.07	-24.8	-3.79	-24.19	-11.33	-4.95	-24.1	-42.2	-6.36	-20.46		-65.62	-33.98	-22.6	-24.18	-56.85	-6.28	-145.85	-21.52
	-11.62	-33.39	-8.84	-16.24	-48.82	-35.15	-27.71	-30	-9.17	-13.36		-114.77	-94.17	-8.37	-19.87	-32.61	-5.57	-47.61	-20.52
	-14.03	-23.53	-18.73	-13.62	-7.08	-17.56	-31.63	-29.81	-8.96	-15.75		-56.21	-40.03	-24.72	-37.37	-37.64	-12.44	-125.08	-33.64
	-14.7	-27.02	-39.07	-18.84	-43.91	-14.41	-17.74	-19.72	-10.2	-15.05		-73.37	-57.07	-18.9	-18.24	-21.37	-6.86	-54.54	-26.94
	-7.91	-11.85	-16.88	-32.65	-15.25	-14.16	-22.31	-28.24	-17.28	-73.61		-30.8	-68.95	-12.85	-77.67	-20.77	-12.7	-72.45	-38.79
	-13.84	-27.9	-23.01	-12.59	-12.01	-11.22	-17.08	-15.77	-139.89	-25.92		-39.6	-56.52	-8.4	-42.17	-15.66	-4.92	-156.8	-34.42
	-6.47	-13.02	-16.61	-8.51	-10.34	-8.86	-22	-8.02	-33.22	-25		-17.49	-29.24	-15.99	-41.81	-41.02	-11.93	-102.66	-41.09
	-73.21	-26.23	-5.53	-15.04	-21.64	-14.91	-11.96	-15.17	-31.09	-22.26		-46.85	-87.24	-14.08	-30.92	-29.94	-7.61	-92.81	-138.62
	-40.4	-13.45	-6.97	-7.71	-10.33	-53.16	-21.16	-23.82	-60.11	-5.62		-42.95	-132.53	-9.97	-22.38	-44.1	-8.85	-121.64	-124.38
	-68.09	-33.53	-10.83	-5.97	-13.13	-14.17	-13.18	-29.72	-50.81	-12.74		-136.76	-51.97	-22.97	-32.18	-52.41	-13.38	-78.58	-141.51
	-56.09	-27.13	-7.96	-128.4	-10.45	-4.59	-27.51	-42.73	-23.6	-17.88		-61.66	-41.02	-40.48	-18.28	-32.41	-8.51	-43.85	-80.06
	-21.98	-14.54	-8.73	-76.18	-10.63	-16.53	-22.28	-11	-8.76	-19.02		-177.02	-72.89	-28.39	-14.48	-11.47	-18.99	-135.43	-112.85
	-35.86	-22.45	-8.7	-54.88	-11.34	-20.91	-10.47	-32.25	-25.16	-28.01		-56.24	-60.13	-33.21	-30.29	-23.79	-13.26	-58.27	-101.47
	-13.28	-17.09	-8.72	-69.81	-11.38	-7.94	-10.42	-18.08	-10.44	-24.96		-101.32	-54.23	-23.52	-14.27	-29.4	-10.2	-85.94	-45.54
	-45.01	-35.05	-10.2	-53.45	-12.34	-8.25	-17.51	-27.04	-30.02	-9.7		-47.52	-38.66	-32.34	-80.03	-65.35	-17.6	-184.39	-95.76
	-12.95	-35.19	-8.6	-72.28	-20.9	-31.02	-5.06	-28.51	-34.85	-7.19		-100.83	-59.22	-16.41	-45.2	-41.55	-7.18	-42.83	-33.14
	-14.8	-21.43	-8.57	-41.18	-20.12	-25.13	-57.45	-26.47	-11.9	-5.67		-17.65	-69.61	-22.08	-18.35	-35	-7.89	-67.85	-31.27
	-4.73	-14.63	-39.14	-37.4	-20.43	-16.41	-12.58	-23.87	-85.26	-10		-30.91	-54.57	-16.61	-25.03	-22.12	-10.02	-111.43	-19.18
	-10.88	-11.47	-32.19	-16.81	-5.07	-20.23	-7.97	-11.6	-100.06	-26.05		-18.71	-34.92	-13.54	-16.15	-29.07	-13.22	-124.08	-45.57
	-15	-14.24	-13.19	-3.43	-6.81	-13.86	-7.54	-14.22	-50.66	-13.38		-19.37	-38.82	-46.54	-16.66	-24.89	-15.09	-120.03	-33.37
	-21.3	-36.62	-27.37	-27.02	-7.89	-8.99	-28.02	-38.41	-93.36	-9.32		-12.95	-23.28	-56.32	-55.5	-29.31	-13.96	-198.04	-189.31
	-5.62	-34.55	-13.64	-22.95	-18.71	-4.25	-12.05	-12.36	-84.11	-16.32		-20.66	-56.17	-36.05	-29.33	-21.93	-8.22	-102.35	-196.66
	-8.1	-38	-15.36	-27.6	-12.07	-8	-6.74	-14.94	-37.01	-11.49		-129.54	-32.33	-25.64	-79.72	-18.51	-6.47	-101.48	-168.76
	-8.41	-18.02	-8.16	-11.05	-17.96	-5.57	-5.71	-12.83	-35.82	-12.97		-29.29	-32	-20.87	-17.95	-40.79	-6.62	-80.71	-72.8
	-31.97	-12.67	-16.4	-9.57	-15.47	-7.32	-12.07	-31.58	-26.66	-12.9		-71.68	-46.89	-43.17	-50.69	-62.31	-18.55	-90.37	-124.74
	-42.81	-34.48	-13.28	-7.87	-13.22	-4.37	-7.93	-15.98	-37.29	-6.22		-78.63	-52.26	-13.65	-58.39	-32.28	-15.38	-112.19	-36.06
	-64.11	-37.71	-11.82	-8.77	-18.43	-8.33	-38.08	-10.27	-67.2	-13.07		-59.33	-58.36	-14.42	-21.42	-24.85	-14.24	-69.52	-79.41
	-48.16	-13.85	-5.51	-114.08	-40.36	-8.01	-32.09	-33.8	-41.24	-23.37		-64.75	-42.91	-12.46	-9.25	-14.92	-10.88	-85.16	-48.36
	-61.79	-20.15	-5.59	-79.99	-11.38	-8.37	-40.37	-6.78	-14.32	-14.51		-58.28	-61.9	-15.22	-22.55	-21.82	-6.91	-74.68	-55.33
	-36.81	-16.1	-8.2	-21.07	-37.06	-28.62	-20.58	-10.54	-4.96	-12.65		-61.19	-40.41	-17.17	-35.43	-18.74	-11.77	-123.53	-46.11
	-19.86	-16.11	-19.49	-36.96	-29.24	-12.6	-14.12	-30.87	-13.14	-14.29		-33.86	-39.75	-14.69	-51.68	-20.78	-5.55	-45.72	-19.44
	-16.77	-33.49	-25.73	-28.64	-32.35	-29.85	-12.64	-30.17	-12.13	-7.43		-28.71	-86.76	-8.39	-50.78	-35	-5.1	-68.49	-33.35
	-21.7	-22.54	-29.91	-39.38	-33.9	-39.45	-29.01	-35.09	-108.46	-20.44		-46.82	-86.72	-8.86	-35.6	-29.46	-23.14	-47.91	-48.68
	-4.91	-25.82	-6.74	-18.23	-23.58	-6.97	-6.54	-33.58	-122.04	-11.89		-32.5	-93.22	-8.41	-16.88	-30.33	-13.8	-48.23	-34.4
	-6.86	-28.34	-9.13	-26.53	-21.04	-12.76	-8.73	-26.24	-157	-6.09		-50.66	-27.53	-40.52	-30.48	-25.43	-20.75	-220.24	-199.98
	-6.21	-14.78	-10.38	-23.71	-46.63	-12.82	-15.77	-20.14	-46.96	-9.45		-15.53	-39.65	-16.68	-40.38	-22.34	-7.89	-81.07	-73.76
	-15.73	-25.52	-7.36	-35.12	-26.93	-4.32	-19.11	-12.46	-51.89	-26.15		-28.01	-25.17	-60.54	-13.55	-32.27	-12.59	-117	-76.88
	-17.77	-45.41	-4.85	-30.69	-21.45	-6.14	-13.87	-22.03	-37.12	-15.14		-138.19	-53.65	-15.82	-5.64	-25.55	-5.79	-110.78	-108.08
	-60.75	-13.94	-7.36	-19.11	-33.01	-7.28	-9.56	-24.11	-39.06	-11.65		-55.61	-61.84	-39.89	-6.38	-30.76	-10.91	-150.84	-104.78
	-64.62	-24.89	-11.06	-20.92	-27.01	-7.81	-4.85	-29.95	-42.9	-13.14		-76.24	-56.16	-29.2	-8.87	-18.36	-9.25	-180.64	-75.75
	-29.09	-17.26	-36.82	-30.52	-33.12	-29.32	-6.83	-25.4	-21.71	-14.95		-60.33	-116.72	-28.67	-18.44	-21.36	-23.99	-88.36	-79.39
	-36.23	-41.24	-23.55	-6.98	-39.74	-24.52	-17.55	-21.71	-13.07	-11.68		-73.79	-75.68	-10.53	-16.99	-26.68	-7.35	-94.42	-59.28
	-45.37	-8.14	-19.7	-66.2	-13.93	-24.2	-21.88	-6.81	-9.02	-9.04		-32.65	-8.21	-13.51	-16.57	-74.74	-10.99	-126.46	-40.56
	-16.36	-28.81	-17.59	-68.49	-49.15	-19.23	-53.14	-28.09	-10.39	-12.03		-72.99	-19.33	-7.29	-24.27	-38.63	-4.95	-82.04	-52.89
	-25.63	-6.95	-11.2	-36.23	-6.31	-6.46	-28.65	-32.41	-39.61	-9.84		-87.66	-44.68	-11.51	-15.83	-28.91	-5.09	-55.3	-95.98
	-26.1	-11.69	-14.96	-92.56	-13.62	-7.84	-42.81	-36.53	-104.44	-10.04		-35.1	-79.98	-7.86	-25.22	-50.63	-8.9	-30.21	-20.88
	-27.69	-17.8	-4.51	-31.09	-19.35	-12.34	-14.86	-37.32	-96.24	-8.08		-43.5	-18.42	-31.87	-18.17	-16.97	-11.27	-63.83	-27.36
	-18.51	-35.72	-56.79	-23.59	-41.1	-9.75	-11.25	-43.67	-127.62	-11.23		-13.15	-16.28	-43.38	-11.36	-25.86	-12.44	-77.08	-41.02
	-11.83	-16.67	-20.95	-50.56	-16.72	-10.82	-15.81	-25.39	-63.41	-17.79		-51.37	-63.38	-54.87	-15.48	-29.72	-9.19	-33.73	-38.27
	-14.26	-34.19	-23.38	-10.73	-19.17	-20.13	-12.95	-17.79	-14.27	-15.65		-31.18	-13.41	-86.1	-61.58	-13.8	-9.52	-75.29	-34.06
	-9.27	-40.02	-26.99	-27.32	-9.85	-25.81	-12.29	-14.75	-52.18	-9.24		-117.65	-22.64	-15.61	-36.3	-16.46	-6.36	-83.89	-55.1
	-4.66	-23.52	-4.19	-24.83	-15.14	-18	-12.42	-16.85	-105.84	-17.5		-63.18	-36.46	-10.52	-39.37	-31.64	-6.77	-153.6	-204.6
	-56.55	-23.89	-7.48	-4.48	-13.47	-20.12	-30.76	-15.75	-18.52	-6.38		-79.4	-33.41	-20.16	-15.79	-21.67	-11.48	-99.58	-86.99
	-50.69	-20.05	-4.14	-14.75	-40.58	-15.44	-7.93	-27.98	-50.33	-20.84		-102.7	-36.45	-28.31	-22.6	-28.21	-7.24	-107.99	-96.38
	-18.22	-32.43	-48.18	-26.15	-11.1	-5.18	-27.63	-10.47	-19.68	-9.32		-57.32	-46.52	-13	-18.84	-16.36	-16.84	-119.68	-212.5
	-13.46	-47.22	-30.07	-7.65	-41.75	-14.51	-8.47	-23.32	-23.57	-11.89		-72.33	-20.62	-17.94	-15.95	-27.88	-18.02	-78.48	-82.02
	-22.48	-40.24	-19.95	-14.7	-19.87	-18.56	-15.56	-18.41	-12.77	-10.21		-94.32	-46.37	-10.48	-29.7	-27.35	-14.95	-55.08	-130.89
	-30.13	-10.66	-28.56	-95.59	-70.4	-8.53	-20.61	-12.88	-39.21	-16.21		-20.97	-43.92	-17.07	-15.67	-27.54	-15.06	-96.56	-133.79
	-38.79	-9.11	-10.63	-97.35	-27.53	-8.11	-15.61	-30.6	-6.08	-18.56		-33.35	-19.39	-7.25	-13.71	-50.15	-5.13	-120.47	-38.61
	-50.02	-18.42	-12.76	-53.21	-38.65	-6.36	-21.14	-55.03	-81.05	-13.32		-49.16	-40.28	-17.62	-34.15	-45.18	-11.77	-102.81	-55.78
	-8.24	-28.36	-9.65	-54.62	-23.03	-5.86	-13.19	-25.99	-150.88	-13.97		-56.9	-59.04	-33.15	-28.09	-34.5	-10.54	-79.92	-76.95
	-10.73	-20.89	-9.11	-80.12	-10.32	-11.93	-13.56	-17.06	-54.23	-19.81		-16.82	-77.63	-75.14	-26.11	-39.88	-3.53	-74.32	-67.76
	-35.81	-26.53	-10.99	-24.73	-21.92	-22.19	-34.86	-20.4	-87.76	-10.11		-24.49	-49.28	-57.43	-34.67	-25.04	-6.98	-42.22	-106.82
	-24.82	-16.81	-9.01	-43.33	-4.1	-27.2	-6.12	-18.68	-63.72	-9.65		-25.91	-82.88	-32.18	-10.26	-15.7	-4.7	-251.7	-59
	-25.47	-21.88	-47.41	-64.26	-11.79	-16.82	-13.95	-18.23	-45.04	-17.03		-13.02	-36.78	-36.83	-11.27	-29.26	-28.27	-148.97	-45.05
	-80.47	-21.8	-50.27	-48.8	-15.36	-9.02	-28.7	-35.57	-19.04	-9.8		-108.59	-32.74	-32.08	-28.24	-26.87	-10.95	-137.58	-91.49
	-44.39	-21.11	-17.01	-37.86	-3.22	-17.22	-16.84	-12.86	-15.01	-14.31		-68.43	-35.58	-21.55	-33.16	-36.03	-6.88	-64.57	-27.81
	-44.04	-10.09	-24.8	-20.83	-10.61	-32.55	-23.81	-23.34	-24.41	-19.61		-71.56	-30.2	-18.96	-34.19	-16.86	-8.63	-161.07	-105.1
	-22.98	-18.53	-22.54	-22.47	-16.73	-13.02	-40.22	-18.15	-20.58	-9.36		-125.6	-39.05	-22.84	-52.98	-22.09	-7.28	-116.55	-215.61
	-34.1	-24.95	-7.07	-52.21	-20.95	-27.29	-5.81	-36.75	-27.72	-11.74		-50.65	-33.04	-47.48	-21.71	-36.8	-7.06	-155.08	-72.24
	-16.72	-25.12	-14.85	-21.5	-17.35	-14.35	-6.96	-15.66	-132.6	-5.98		-69.22	-33.52	-77.24	-18.39	-21.45	-6.08	-41.84	-63.46
	-12.54	-19.95	-8.69	-22.05	-16.46	-25.13	-9.25	-33.69	-69.36	-7.22		-64.23	-12.65	-14.66	-16.9	-13.94	-5.65	-66.54	-87.34
	-7.36	-24.09	-8.43	-29.88	-19.31	-9.83	-36.1	-24.51	-67.31	-12.56		-49.78	-46.78	-16.19	-26.71	-27.96	-7.74	-56.97	-45.88
	-7.54	-23.55	-7.09	-11	-11.72	-31.12	-15.82	-29.12	-61.62	-8.4		-33.69	-38.4	-26.01	-39.82	-28.85	-8.11	-63.71	-123.95
	-15.55	-35.04	-39.12	-8.71	-16.94	-22.57	-15.06	-56.32	-49.74	-31.43		-38.73	-14.91	-14.81	-37.86	-78.42	-4.91	-85.15	-92.46
	-23.43	-19.72	-22.27	-123.09	-7.63	-32.63	-28.01	-10.31	-38.04	-15.35		-18.98	-24.65	-8.61	-37.27	-56.84	-8.46	-96.86	-90.99
	-60.61	-47.35	-29.38	-62.21	-8.73	-18.99	-2.7	-26.95	-68.16	-19.37		-29.01	-38.9	-14.61	-18.01	-44.12	-8.24	-62.47	-38.34
	-45.92	-16.37	-23.46	-98.48	-14.21	-20.97	-7.97	-14.1	-17	-29.87		-110.06	-33.93	-22.21	-22.93	-22.8	-9.2	-76.99	-32.67
	-51.05	-16.55	-10.64	-53.29	-30.53	-12.85	-8.67	-40.28	-27.53	-11.48		-59.17	-103.72	-17.56	-33.21	-20.78	-17.71	-134.33	-51.48
	-60.49	-30.61	-13.85	-26.69	-32.35	-10.11	-7.25	-23.21	-5.1	-20.65		-78.38	-21.09	-8.73	-12.53	-21.64	-8.75	-138.52	-70.2
	-18.2	-29.49	-15.01	-44.54	-32.05	-9.1	-16.48	-11.38	-13.12	-6.17		-123.37	-49.25	-9.71	-26.42	-23.04	-5.07	-138.25	-36.97
	-17.5	-30.17	-9.99	-60.2	-67.15	-21.35	-10.09	-13.82	-12.11	-5.98		-33.11	-137.76	-3.01	-11.4	-18.85	-10	-62.87	-26.5
	-17.72	-48.24	-15.24	-28.71	-24.07	-13.05	-25.51	-23.68	-14.45	-20.59		-74.17	-67.35	-17.52	-34.92	-25.77	-5.73	-108.33	-35.65
	-9.86	-32.32	-13.9	-20.25	-36.1	-10.88	-20.49	-12.79	-46.88	-21.53		-41.02	-41.12	-27.49	-24.09	-41.57	-9.51	-92.96	-15.96
	-18.99	-10.85	-8.67	-29.89	-20.61	-4.83	-14.99	-27.41	-20.71	-14.56		-16.21	-47.02	-23.43	-29.76	-24.26	-14.29	-95.23	-213.78
	-9.73	-24.24	-11.11	-14.69	-10.06	-6.7	-31.08	-10.8	-12.59	-10.08		-20.73	-33	-28.64	-34.09	-24.31	-16.48	-59.76	-99

## Sheet: sup1
Figure Sup 7
C	Rise Time
		WT	KO
	Mice n =	9	7
	Cells N =	26	26
	Mean	3.546	3.39
	s.e.m.	0.1187	0.1273
	Unpaired t test		P value	0.375
	Decay Time
		WT	KO
	Mice n =	9	7
	Cells N =	26	26
	Mean	15.04	16.33
	s.e.m.	1.299	1.638
	Mann Whitney test		P value	0.7133
D	Time to peak
		WT	KO
	Mice n =	6	3
	Cells N =	10	8
	Mean	3.782	3.719
	s.e.m.	0.0267	0.03613
	Unpaired t test		P value	0.1692
	Rise Time
		WT	KO
	Mice n =	6	3
	Cells N =	10	8
	Mean	2.555	2.436
	s.e.m.	0.04483	0.05997
	Mann Whitney test		P value	0.0639
E	CF-EPSP during LTD induction
Spikelets	Unpaired t test
	P value	0.5791
	P value summary	ns
	Significantly different (P < 0.05)?	No
	One- or two-tailed P value?	Two-tailed
	t, df	t=0.5612, df=28
Area CF	ANOVA table	SS	DF	MS	F (DFn, DFd)	P value
	Time x Genotype	23055925593	299	77110119	F (299, 8372) = 0.7191	P>0.9999
	Time	126770710889	299	423982311	F (299, 8372) = 3.954	P<0.0001
	Genotype	667879486325	1	667879486325	F (1, 28) = 3.001	P=0.0942
	Subject	6231057351862	28	222537762566	F (28, 8372) = 2075	P<0.0001
	Residual	897684633736	8372	107224634
Area hyperpolarization	ANOVA table	SS	DF	MS	F (DFn, DFd)	P value
	Row Factor x Genotype	46824014727	299	156602056	F (299, 8372) = 0.7639	P=0.9990
	Row Factor	343953417438	299	1150345878	F (299, 8372) = 5.611	P<0.0001
	Genotype	488760685959	1	488760685959	F (1, 28) = 1.966	P=0.1719
	Subject	6961955062560	28	248641252234	F (28, 8372) = 1213	P<0.0001
	Residual	1716315142433	8372	205006587
