# Supplementary material for: Sushi domain-containing protein 4 controls synaptic plasticity and motor learning
Source: eLife. 2021 Mar 4;10:e65712. doi: 10.7554/eLife.65712 (PMC7972451; doi:10.7554/eLife.65712)
Supplement: Figure 4—source data 1. [file elife-65712-fig4-data1.xlsx]

## Sheet: Figures_4B_+_Sup1A
Figure 4B + Figure Sup1A
GLUR2
IN/corresponding IN βActin
	CTL								K-Glu
Exp	E1	E2	E3	E4	E5	E6	E7	E8	E1	E2	E3	E4	E5	E6	E7	E8
SUSD4 WT	0.425994	0.373212	0.470046	0.841423	1.15459	0.568458	0.697367	0.804769	0.481031	0.413365	0.530409	0.744022	0.946947	0.5018	0.602796	0.756216
SUSD4 KO	0.686388	0.328011	0.303069	0.246975	0.436611	0.969375	0.821931	0.94976	0.700824	0.333707	0.296551	0.256954	0.438989	0.844279	0.860638	1.0335
IP/IN normalized to βActin
	CTL								K-Glu
Exp	E1	E2	E3	E4	E5	E6	E7	E8	E1	E2	E3	E4	E5	E6	E7	E8
SUSD4 WT	22705.1	25185.5	16463	5980.9	8838.03	16913.1	5095.52	10147.7	7944.42	8384.8	10556.6	5633.2	6644.65	5406.51	6503.77	5764.78
SUSD4 KO	8098.32	13087.4	31596.1	38580.3	11807.5	8612.42	9932.54	6662.74	8835.9	7046.08	9223.22	11814.1	13606.3	6091.1	6526.59	6847.64
Proportions CTL vs K-Glu
Exp	E1	E2	E3	E4	E5	E6	E7	E8	t-tests on ratios
SUSD4 WT	0.349896	0.332922	0.641231	0.941864	0.751824	0.319664	1.27637	0.568087	0.0211734
SUSD4 KO	1.09108	0.538386	0.29191	0.306222	1.15234	0.707246	0.657092	1.02775	0.0538385
Expected ratio	1	1	1	1	1	1	1	1
	CTL vs K-Glu
	SUSD4 WT	SUSD4 KO
Mean	0.647732	0.721503
s.e.m.	0.119101	0.120333
N	8	8
Theoretical mean	1	1
P value (two tailed)	0.0211734	0.0538385
Two-tailed Student’s one sample t-test was performed on the ratios with a null hypothesis of 1

## Sheet: Figures_4C
Figure 4C
GLUR2
IN/corresponding IN βActin
	CTL								K-Glu								Leup-MG132								Leup-MG132 + K-Glu
Exp	E1	E2	E3	E4	E5	E6	E7	E8	E1	E2	E3	E4	E5	E6	E7	E8	E1	E2	E3	E4	E5	E6	E7	E8	E1	E2	E3	E4	E5	E6	E7	E8
SUSD4 WT	1.22302	1.38377	1.66848	1.54375	1.41622	1.24156	1.47739	1.18557	1.03749	0.992922	1.44147	1.19164	1.29209	1.26853	1.20319	1.19359	0.827746	0.986954	1.81518	1.17894	1.19401	1.39046	1.26035	1.56979	1.22043	1.02774	1.35612	1.46225	1.56825	1.14289	1.49391	1.36497
SUSD4 KO	1.22003	0.755105	1.95336	1.07095	1.32749	1.10761	1.53527	1.46819	1.56357	1.2824	1.61591	1.15376	1.30974	0.990703	1.4596	1.66229	1.61613	1.2254	1.5551	1.33648	1.28612	1.09292	1.55253	1.549	1.39952	1.28682	1.42209	1.20077	1.22427	1.25228	1.34046	1.47196
Proportions CTL vs K-Glu
Manip	E1	E2	E3	E4	E5	E6	E7	E8	t-tests on ratios
SUSD4 WT	0.848304	0.717547	0.863944	0.771914	0.912355	1.02172	0.814403	1.00676	0.010691
SUSD4 KO	1.28158	1.69831	0.827249	1.07733	0.98663	0.89445	0.950714	1.1322	0.317579
Expected ratio	1	1	1	1	1	1	1	1
Proportions Leup-MG132 vs Leup-MG132 + K-Glu
Manip	E1	E2	E3	E4	E5	E6	E7	E8	t-tests on ratios
SUSD4 WT	1.4744	1.04132	0.747095	1.24031	1.31342	0.821949	1.18531	0.869529	0.375488
SUSD4 KO	0.865973	1.05012	0.91447	0.898461	0.951905	1.14581	0.863406	0.950265	0.233812
Expected ratio	1	1	1	1	1	1	1	1
	WT		KO
	CTL vs K-Glu	Leup-MG132 vs Leup-MG132 + K-Glu	CTL vs K-Glu	Leup-MG132 vs Leup-MG132 + K-Glu
Mean	0.869619	1.08667	1.10606	0.955052
s.e.m.	0.0377913	0.0915816	0.0985596	0.0344973
N	8	8	8	8
Theoretical mean	1	1	1	1
P value (two tailed)	0.0107	0.3755	0.3175	0.2338
Two-tailed Student’s one sample t-test was performed on the ratios with a null hypothesis of 1

## Sheet: sup1B
Figure Sup1B
GLUR2
IN/corresponding IN βActin
	CTL
Exp	E1	E2	E3	E4	E5	E6	E7	E8
SUSD4 WT	1.22302	1.38377	1.66848	1.54375	1.41622	1.24156	1.47739	1.18557
SUSD4 KO	1.22003	0.755105	1.95336	1.07095	1.32749	1.10761	1.53527	1.46819
	SUSD4 WT	SUSD4 KO
Mean	1.39247	1.30475
s.e.m.	0.0599424	0.127045
N	8	8
Student T-test		P value (two tailed) = 0,5424
GLURδ2
IN/corresponding IN βActin
	CTL
Exp	E1	E2	E3	E4	E5	E6	E7	E8
SUSD4 WT	0.952781	0.726053	0.589757	0.85659	1.15914	0.73958	0.404412	0.832907
SUSD4 KO	0.954366	1.18467	1.32611	0.770562	0.571034	1.02454	0.516932	0.392187
	SUSD4 WT	SUSD4 KO
Mean	0.782653	0.842552
s.e.m.	0.0806241	0.118342
N	8	8
Student T-test		P value (two tailed)= 0,6821

## Sheet: sup1C
Figure Sup1C
GLURδ2
IN/corresponding IN βActin
	CTL								K-Glu								Leup-MG132								Leup-MG132 + K-Glu
Exp	E1	E2	E3	E4	E5	E6	E7	E8	E1	E2	E3	E4	E5	E6	E7	E8	E1	E2	E3	E4	E5	E6	E7	E8	E1	E2	E3	E4	E5	E6	E7	E8
SUSD4 WT	0.952781	0.726053	0.589757	0.85659	1.15914	0.73958	0.404412	0.832907	0.772259	1.3557	0.672013	0.973141	0.978831	0.708591	0.475998	0.649729	1.6387	1.42208	1.03048	1.32201	1.03589	1.18031	0.734576	1.10377	1.5127	1.44089	0.710778	1.04163	0.913131	0.828538	0.949671	0.867054
SUSD4 KO	0.954366	1.18467	1.32611	0.770562	0.571034	1.02454	0.516932	0.392187	0.924118	1.18698	1.36256	1.03825	0.919753	0.435476	0.722904	0.528808	1.37542	1.32005	1.37873	1.30404	0.840841	0.660819	1.16136	0.489264	1.24306	1.2145	1.14324	1.50587	0.836622	0.564013	1.22208	0.619155
Proportions CTL vs K-Glu
Exp	E1	E2	E3	E4	E5	E6	E7	E8	t-tests on ratios
SUSD4 WT	0.810531	1.86722	1.13947	1.13606	0.844444	0.958099	1.17701	0.780074	0.497312
SUSD4 KO	0.968305	1.00194	1.02748	1.34739	1.61068	0.425044	1.39845	1.34836	0.314334
Expected ratio	1	1	1	1	1	1	1	1
Proportions Leup-MG132 vs Leup-MG132 + K-Glu
Exp	E1	E2	E3	E4	E5	E6	E7	E8	t-tests on ratios
SUSD4 WT	0.923108	1.01323	0.689753	0.787912	0.881493	0.701966	1.29281	0.78554	0.143334
SUSD4 KO	0.903764	0.920043	0.829201	1.15478	0.994983	0.853506	1.05228	1.26548	0.953769
Expected ratio	1	1	1	1	1	1	1	1
		WT		KO
		CTL vs K-Glu	Leup-MG132 vs Leup-MG132 + K-Glu	CTL vs K-Glu	Leup-MG132 vs Leup-MG132 + K-Glu
	Mean	1.08912	0.884477	1.14096	0.996755
	s.e.m.	0.124503	0.0700968	0.130049	0.0540168
	N	8	8	8	8
P value (two tailed) =		0.4973	0.1433	0.3143	0.9538
Two-tailed Student’s one sample t-test was performed on the ratios with a null hypothesis of 1
