# Supplementary material for: Sushi domain-containing protein 4 controls synaptic plasticity and motor learning
Source: eLife. 2021 Mar 4;10:e65712. doi: 10.7554/eLife.65712 (PMC7972451; doi:10.7554/eLife.65712)
Supplement: Figure 5—source data 1. [file elife-65712-fig5-data1.xlsx]

## Sheet: Figures 5D, Sup2
beta-actin		beta Actin
raw values		181127	181206	181211
pHAspHASusd4		8414.28	9668.74	7661.18
pCIGLUA2	pCAG PVRL3a	8385.71	8313.52	8954.88
	Susd4	7857.52	8623.4	8370.3
	Susd4DCT	7725.59	8536.81	8528.71
	Susd4DNT	7488.05	9875.59	7666.93
	Susd4-NT	6980.1	8514.17	7176.93
	Susd4DPY	6737.78	8290.88	8517.78
	Susd4DLY	7695.47	8145.59	7559.12
	Susd4DPYLY	8608.74	7526.69	8051.93
		unknown	ECL 36 sec	ECL 40 sec
INPUT raw values		GLUA2 INPUT				HA INPUT
		181127	181206	181211		181127	181206	181211
pHAspHASusd4		62.121	53.243	0		9360.65	16684.4	19615.6
pCIGLUA2	pCAG PVRL3a	7468.76	7239.44	5412.31		161.536	0	695.192
	Susd4	2695.33	2086.84	343.263		10461.7	16309.5	19896.3
	Susd4DCT	4053.15	2987.84	1436.23		12411.6	17361.8	19689.1
	Susd4DNT	4125.86	3576.33	1378.06		2528.03	4182.08	6313.47
	Susd4-NT	1342.13	1223.31	684.406		15210.2	27086.3	24408.6
	Susd4DPY	1935.96	1828.26	646.527		9615.82	25001.6	27565.3
	Susd4DLY	1572.43	1935.96	764.113		9260.19	25356.5	23648.8
	Susd4DPYLY	607.991	2705.62	797.527		8371.41	25284.7	28715.7
		FEMTO 3sec	5 sec	2 sec		DURA 1sec	0,3 sec	0,3 sec
INPUT normalized to beta-actin		GLUA2 normalized INPUT				HA normalized INPUT
		181127	181206	181211		181127	181206	181211
pHAspHASusd4		0.00738281	0.00550672	0		1.11247	1.7256	2.56039
pCIGLUA2	pCAG PVRL3a	0.890653	0.870803	0.604397		0.0192632	0	0.0776327
	Susd4	0.343025	0.241998	0.0410097		1.33143	1.8913	2.37701
	Susd4DCT	0.52464	0.349995	0.1684		1.60656	2.03376	2.30856
	Susd4DNT	0.550992	0.362138	0.179741		0.337609	0.423477	0.823467
	Susd4-NT	0.19228	0.143679	0.0953619		2.17909	3.18132	3.40098
	Susd4DPY	0.287329	0.220514	0.0759032		1.42715	3.01555	3.23621
	Susd4DLY	0.204331	0.23767	0.101085		1.20333	3.11291	3.12851
	Susd4DPYLY	0.0706249	0.35947	0.0990479		0.972431	3.35934	3.56632
IP raw values		GLUA2 IP				HA IP
		181127	181206	181211		181127	181206	181211
pHAspHASusd4		36.657	74.121	172.121		22865.6	16899.2	30007.1
pCIGLUA2	pCAG PVRL3a	136.364	65.536	38.121		619.778	0	768.364
	Susd4	1624.36	1879.01	890.941		20765.4	15127.3	24597.5
	Susd4DCT	2604.72	5512.5	2438.33		29661.8	24238.8	31727.4
	Susd4DNT	566.991	638.284	775.577		3649.71	6716.44	7565.15
	Susd4-NT	4697.03	1203.77	6377.23		4912.49	5567.8	18630.8
	Susd4DPY	1395.94	446.577	1522.55		27882.5	19201.1	25762.1
	Susd4DLY	835.527	2260.89	1359.31		27898	18704.2	23512.4
	Susd4DPYLY	1594.77	1666.77	2752.45		27107.4	18537.9	22604.3
		Femto 30sec	5 sec	5 sec		DURA 1sec	0,3 sec	0,3 sec
(GLUA2 IP / GLUA2 INPUT norm ) / (SUSD4 IP)		GLUA2 IP ratios
		181127	181206	181211
pHAspHASusd4
pCIGLUA2	pCAG PVRL3a
	Susd4	0.228042	0.513282	0.883227
	Susd4DCT	0.16738	0.649795	0.456369
	Susd4DNT	0.28195	0.262422	0.570375
	Susd4-NT	4.97265	1.50476	3.58943
	Susd4DPY	0.174243	0.105471	0.778627
	Susd4DLY	0.146572	0.508587	0.571918
	Susd4DPYLY	0.833016	0.250123	1.22937
